# Supplementary material for: Evolution of RGF/GLV/CLEL Peptide Hormones and Their Roles in Land Plant Growth and Regulation
Source: MDPI journal article supplement (doi:10.3390/ijms222413372), 2021-12-13
Supplement: s1 [file s1]

Group 1

>GRMZM2G331770 49

MKMRAPAVAF AALLMLLVVATRAHGIRLDRQLHDAINSSKEMADPRRTGDAEASSIAAGD  
SVKEHCTRDGRCSGT KAEKALAHAEAAA EAKQQQGDSTGNDHRGTTVGGEAATQQGR  
RHEEEAAAAPTDSYSSSSPEAPGVAARQRQTYPDIMDIAGMDYSPAARKPPIHN

>Sobic.006G237600 79

MKMRTPAVAF AALLMLLLGTRAHGIRLDRQLHEAINSKKMADSKAGDAKASIAGDDSV  
KKHCTPDGRCSGKVKKALAHPEAAA EAKQQKNNSTGSDHRSSTPVDGEATSQQGRRHE  
AAAEATTPAASSSSPAPPGVPRQRQTYPDIMDIAGMDYSPATRKPIHN

>Seita.7G260000 58

MRTC AVAF AALLLLLLLATRAHGIRLDRQLHEAINSKEMADPKSGDGEASIADDSVKKHC  
TPDGRCSGAKVKKALAHAEATAEAKHQVSSSTGNGHTTTVDDAEAASQPRVARQRQQT  
YPDLMDIAGMDYSPATRKPIHN

>GRMZM2G331764 45

MTGLVRLPAGDRQGMIC HMRLCVRALGSRTKAEKALAHAEAAA EAKQQQGDSTGNDH  
RGTTVGGEAATQQVRRHEAEA PAASYSSSSPAAPGVAARQRQTYPDIMDIAGMDYSPAA  
RKPIHN

>LOC\_Os04g55100 34

MHTRTRTSLLALASLLLLLATRAHGIRLDRQLHEAINNKEIMRDSKAEQSLNTARLMNK  
HCTSDGHCNSGKVQRPVVQAEAGAAAKQQQQNQSLERSGDANQQEQETAPRQQEKTSS  
TATATMTTYPDILDIAGMDYSPATRKPIHN

>Bradi5g23717 92

MRTSSMVMASLLLLFLLLATRAHGIRMDRQLHDA LSSKEPAGDSKAAAQPS ELAAHSASK  
HCASDGRCS DAGKAKKAAAPAHA AKHHQPIPGGGKREEEEEEAAPSSRVLPQENNA A  
TTYPDILDIAGMDYTPANRKPIHN

>GRMZM5G846550 39

MKMRTPAVAF AALLLLLLQITTRAHGIRMDRQLHEAINSKKKMMADPKSGGGGGEAASIA  
AAGDSVRKHCAPDGRRRCSGTTKQMTPTTVVGSRYSEVAMIISAHAAPRFHEDYYGPSG  
HEPNHH

>GSVIVG01012874001 194

MKTSLSICLLLLSLILSQVQGIRLDKGFSSAGHQKIQVEEGSPIKITSNGGLVGEVTLCRDG  
HCSSGINRKLMTKTTSTSTPTTNSKNVKNNGGKSGDQVPGREENFYVNASPVSEHPEA  
APEGYPDIIID IAGMDYSPARRKPPIHN

>Solyc07g007270.2 109

MKQVLLLSLLLLSTLVYEAQARNIPMLKEN GDFGEVNIICKDNHCSSSGRNRKLMTKTTS  
TSSPITTTTSTKNIKNEGNIKAHDTTILKGQSSSENF SINSSPETGHRKTSSDRHPDVLDLAG  
MDYSPAKRKPIHN

>Potri.006G060000 122

MRLSVVVSLLLLSFL LQQAQGIRLEKGFQVGAQKVQAEKSPSKEKSNDGGVLGEAILCK  
EGQCTGMNRKLI AVTTTTSSSTTITISKNEKNGENKADHISKGRSTNGEIVGENEKL SVNSS  
PNSEHRVTKDHNEEIMDLTEMDYSPARRKPPIHN

>MDP0000164386 192

MTTSSLAVPLLLLLCLLLSQAQGIRPEKGFSSVRQQNKNIQEEENASMKRSNIAAGXAGEP  
SNIASSGGTRKLISVTSPSSATTTSKNEKKGRKNRGDSEPKGENVNSHGGEDGNGKAKSP

VVSKQQEAAAAHQHYPDADMTEMMDYSPAKKKPPIHN  
>MDP0000299658 187  
MTTSSSAVSLLLLSFLLLSQAQGIRLEKGFISVRQQNNNIHKEENSVVKRSNIAAAGLAGEP  
SNIASSGSTRKLISATSPSSTTTTTTSKNEKNGREKRGDPEPKGENIKSTTQHGGKNGNVRA  
KSPVISKQREAAAAHQHYPDADMTEMMDYSPARRKPPIHN  
>Glyma.13G165000 154  
MKPSFVVSLLLLSLLLAKTQGIRLGKVSSAVQQQKQHDGESTLLKRSSTDTEEASLCKDN  
ACTGNIKNRKLVTNPVSTAQSLSKNVEESKVDPSVNGNTRNVNTLSTSKHKDVPEEHYHD  
LVEITEMDYSPAKRKPIHN  
>Glyma.17G106100 163  
MKPSFVVSLLLLSLILAKTQGIRLGKVSSAVQQQKQHDGETTLLKRSNTGAEELASLCKENE  
LCTGNIKNRKLVTIPVSATQSLSKNVEESKVDPSVNGNSRNVDLSTSKHKDVPEEHYHDL  
VEITEMDYSPAKRKPIHN  
>Medtr4g116360 134  
MKPSCVVSLLILSLLLTKTQGIRLGKGSFAFEQQKQHDDEERSTMLKRSNTDSEELATCND  
QQKCTGNIKNRKLVTTSISTTKSLSKNVKNSDVAHTSVNGNTRNVNLNGEAEIKVKSL  
STSNYLPEDLVDITEMDYSPARKKSPIHN  
>Medtr2g450420 135  
MRASFLISLVLLSLLLTAKAQGIRLERGSLAARPNKHAKESNLLRRSNSGDEELAILCKDEQCT  
GKIKNRKLFTTSTSAIHANSKKGSRDVAFTNTVKKVNAGGNEGNTTGNDKANGKEHEIR  
VKQQQEEDVREELIEISDMDYSPAKRKTPPIHN  
>Potri.018G119800 125  
MKMLTTPHPIIYPKSFSIYILAGMGRKLIATTTSTSTTTTTSKNEKNEGKAGSISKRRSSK  
EEIVGEREKLIVNSWRNSDHKVNEDHYEEIMDLTQMDYSPARRKSPIHN  
>Potri.018G115600 128  
MKMLTTPHPIIYPKSFSIYILAGMGRKLIATTTSTSTTTTTSKKENNEGKAGPISKWRSSK  
GEIVGEREKLIVNSWRNSDHKVNEDHYEEIMDLTQMDYSPARRKSPIHN  
>Cpa.g.sc46.77 201  
MISIDAGNNRKLSTSATNLKNASNNPTIQKGLSENTEVKVNEDRQEDFPMNSPAPPSSSK  
HQEEGYTDVMGITMDYSPARRKPPIHN  
>ATR0767G008 18  
MRRAEILSLLFLCSMATAQGLSLNMELKRSLSRGIAVKKWVGFKERRRVAEEEEIDVRKPVT  
GNSRKLLNKISSIQLDFDLTSKVSDDSKRKELGNGGMERRSLSSMKKKGGVGEEYQKFSS  
NDPLPDDLVDIAGMDYSPARRKTPPIHN  
>ATR0800G012 20  
MASPQFLRVPLLLLLLILSEGRPLAVGNGVEERRRESVVGEELVPVNVHVDGYDPDPMIA  
GMDYTPAGKKKPIHN  
>Potri.007G077300 123  
MAKISRNHLVLVAFFLLCFVSTCARAARTLREASNHGAEEKDQNDMFPSKENGLPDVEEL  
VGMDYTPARKKPIHN  
>Potri.005G087000 124  
MAKISRNHLVLVAFFLLCFVSTCARAARTLREVNNHEVEKKDHNNLFPSKENGLHDVDEL  
AGMDYTPASKKPIHN  
>MDP0000180378 184

MAAIPCKHLVVVAFFLLCFVSITAQGRSLGLVSKRAGDAYQKNEDDQAVVLQDEINDLLA  
MDYTPARKKPPIHN  
>MDP0000144167 183  
MAAIPCKNLVVVALFLLCFISITAQGRSLELGVVSKGAADAHQKKSHDLHDTTFKQKQDD  
DQGVVLPDESNDLLAMDYTPARKKPPIHN  
>Glyma.04G217800 162  
MAVSPSKRFLLVAFLLLCFLSINATARILRETKGELAPVSTEKSHENQFMPNQGGEQDIGDL  
ATMDYTPAKKNPPIHN  
>Glyma.06G148100 170  
MAMSPSKRCLLVAFLLLCFLSINATARKLRETKDELAPVLTTEKSHENQFKPNQGGGGEQ  
DLGDLATMDYTPAKKNPPIHN  
>Medtr8g092340 139  
MAIAQNKRFLVVVFLICFISIQARARTLKEKSNDVTSNTHNNKEDHMFKAKEEHNVGDE  
VFSMDYTPARRKPPIHN  
>Glyma.05G186400 153  
MVVLNKRILLVAFFFLCFISIHARARVLKEKSNMVDSTSSDASTAHHSETHDHVFKPKEGK  
YNANEVFSMDYTPARRKPPIHNLN  
>Glyma.06G148200 169  
MASSQIKRILFVAFIILCLFSSQTIAARTLKEKSNLTSGDANSVQHNKEAHAKVFKPKDEDV  
NVGGDVFSMDYTPASRKPPPIHN  
>Glyma.04G217600 152  
MASSQNKRILFVAFVILCLFSSPTIAARTLKEKSNLTSGDVNTVQHNKEAIAKVFKPKDED  
VNVGGDVFSMDYTPASRKPPPIHN  
>Medtr3g095180 141  
MVASQNKRILQVIFVLLCFFSIHIQVKARVLKEINNQSSEGVNKAQQHKEVHADMFKLKE  
GGDNVGSVDVFTMDYTPASRKPPPIHN  
>Glyma.08G144800 157  
MSPNKRLLLVAFLLLCFITMTASARSLRDIKDDAVKKSTQTSFFKPNHEGVQDSNDELDTM  
DYTPAKRNPPIHN  
>Glyma.05G186300 176  
MTIKRGQLGHVLCKCIVTHNTFIPKTLQELSKIMAMSPNKRLLLVAFLLLCFITMTASARSL  
REIKDDAVKKSTQTSFFKPNHEGAEDSNDELDTMDYTPAKRNPPIHN  
>GSVIVG01022266001 195  
MAPCKCLILLALLLCFFFFTTANATARSFGVMESNQYESAEKGHDSKFKPSEDGVLPEPE  
EIGDLAEMDYTPPRKKPPPIHN  
>Medtr8g092320 143  
MAVVPSKRLLIAFLLICFILTTTQARNLRDTNDGDEKGQSSLFCLNHEGTQTQEKTQTQEK  
NDDLDTMDYTPASKNPPIHN  
>Cpa.g.sc72.52 198  
MGRHSYNYNKGDLLMVFILACFITATATARKLSNTWVDHEKRNHVEPRVEENIVDDVV  
VMDYTPAEKKPPPIHN  
>Glyma.08G145000 149  
MDSTSDARTYYQSETHDDHVFKPKEDKDNANEVFSMDYTPARRKPPIHNLN  
>Glyma.16G164100 165

MLHNLSLEKLAGGKDMKLVLSTKVVLIVFLVICYFSSSLIGGHARSVRTDPFGIHATHLG  
QENLVNSEKQEKLKDDEGDLVSMDYTAPRRKPPIHN

>Glyma.02G079700 167

MKPVLSTKVVLIIAFLVICYFSSSLIGAYARSVRTDTFGIHATHLGQENLVNAEKKEKVIKD  
DEGAQLVSMDYTAPRRKPPIHN

>Solyc04g051420.2 115

MAIVNQKTHWFLIMSFIFFFLITCQARNLQVDNCELVQKNGNQVVISTKEKSEYEDSVA  
IDIDYTPARKKPPIHN

>PAB00024943 8

MGYKFMAAFLGLLLLACSSIQAAAYTNTEEGNIHAENTLPLEYPVASRVDELLGQSSGENN  
EIVSRKLLRGSVGRGLTESEKAEHSRFQAKRSESDSLHVPDRDLASKNREGIANDHHELL  
LSGSLASTRTPVSAIKVVNTGSGQHQPQLITGKEVRVASLKSFLSSLYHNLHKRISLREVL  
KKQILSDTMANNPGVSSNKHPTSPVSLQVSQPFSDPYATSESPTPDDTTDITDMDYTPAQK  
KPPIHNKSAP

>PTA00026785 15

VFLHLGIILNLMAYKFMAALLGLLLVASSSIHAAAYTNTKESNTHAENTLPLDNMAASRVDE  
LIGQSSGEHNEMVSRKLLRGTVGKALTESEKAKHGRLQTERSESDSLHVPNRLASKN  
RAGIANDHRELLSGSPASMRIPISATQVANTGSGHHLPNLQITGKEGRLTSLKSLLSNLDHN  
LHKRISLQEVVKKQIVSDTMANNPGVGSNKHNPSTVSLQVSQPFSDPHATSESPTPDDTT  
DITDMDYTPAQKKPPIHNKSAP

>Medtr6g043230 145

MKQGQSRKIVLLIAFLVLCCFSSFLLGAYARNLRIDSFEFHARHTGNGGVKHEDYVVSTM  
DYAAVKRKPPPIHN

>PTA00022754 14

MILRSSSVSKAVISCKAVMTVTEFLALLIICSALASTSLQARAHHEGTGLVGRRTNFFTQKQ  
SASHTQNQSDSSVENNNGMELASDRSIPKRLRRMESTQADRKLTKNDRITEKKPIQTRTG  
AANGNVLRKPEAVKGAAHSSLASKSKRLRPSSGIQTTLSSLHESKVVSKEKMEGLAQEL  
EITTKRTLKSTASSPSQGQGKEEISNETNTYKPAPPSATSGRRGQTSPIPQSQTFHVSGSMTY  
ESSEASDLSDIIGMDYGRARRKPPIHNKVPEP

>PAB00039641 11

MIIRGSVSTVIIACKTIMTVTQLLALLITCSALASTSLQAQEHHEGTRLVVMQTNFLPVEQ  
SASRTQYQSDSSVENNNGTELASYRSLPRRLRGMGWTLADGKLTSEERRTEKKPVETRTH  
GAKGHVHRKHGVTGAAVSSLASESKSLRPSSGIQSNLSYPQESKVISEEKMDGLAIQELA  
ITTKRSLKSIASSPSDGQEKEEISSESNSYKPAPPSATSGHRAQASPTPEAQTFHVSGSMTSE  
SNDASDLSDIIGMDYGRARRNPPIHNKAPKP

>AT5G64770 104

MAIRVSHKSFLVALLLILFISSPTQARSLREVVRNRTLIVVEKSQESRKIRHEGGGSDVDGL  
MDMDYNSANKKRPIHNR

>PAB00056331 9

MPNEAAQLRKWNLQPAFFGRRDGGVSQDSSVLVGYYKLEANAKLRGLNDIERRFIERLG  
EENTAGMPEKHSSLKRILSIVSGSRPSMKMGYQNKFSGTQEAKSSSRTL CNIPETSKARPM  
DEGAAMIPPKPQGDKDDGDVVNAMDYAPAHKKPPIHN

>PTA00019540 13

MMITTCKIVVIMLFALFFLSSNCRQMAIEAAQLRTWTLQPDFSGSRAHGVSQDSSVLVG

DNLEAANAKTRGVNDIERKYAEHQGEENTAGTPEEHRSLKRSLLLSEARPSMKLGSQNK  
FSGTQEAISSRTL CNIPETSKARPIEEAAAMTPPQPEGDQDVGDLINAMDYAPAHNKPIH  
N

>PAB00028190 12

MTEYQQQNEQTIKELLSCYHVEEEPPDEDDPHNIQIIDIEEEREVEDPRRPETASAKELNL  
RGDGKGRKHSRIYDYDVYNDLGNPDKSKDLARPVIGGEDIPYPRRCRTGRSPTETDPL  
AESRVEEPTPLYVPRDETFEEIKQDTFAAGHEKIDGLAIQELAITTKRSLKSIASSPSDGQEK  
EISSSESNSYKLAPPSATSGHRAQASPTPEAQTFHVFGSMTSESNDASDLSDIIGMDYGRAR  
RNPHIH NKAPK

>AT4G16515 101

MSCSLRSLVIVFCFILLSSNVGCASAARRLRSHKHHHKKVASLDVFNGGERRRALGG  
VETGEEVVMDYPQPHRKPPIHNEKS

>Smo\_407655 4

MVNAASTALALGCCCCLLAAACLLCSADASRATVEPHSLRPPVGAKKQASRRMLTEGAR  
GQARRVLKALDFEQAPPAQGPLYSSSFTSKSHIPSDSDELMMDYTPVHRKPPINNRIPY  
LPVHYSPGRGQ

>Potri.001G122600 120

MSTLFLLLICLSLHACNARFLRLTDKETKKQVLNKVLVQDVKLNINRTTLAPSEMMPP  
VSEEQGAQGQEVVGRDETITRKISLLSATTMKKKDEEAFMKQEEGTKGATSGNKVIVSSQ  
ADLQQSSKIIIEGLKGRGRSMLGSTANDTEEAVRSEENDIAEDVAVMDYAQPHRKPPIHNK  
KP

>Soly08g078840.2 110

MFINMSKFLVYLLVCICISLHACSARPLASMDDKENKILLSSKDVKFLTSDISKTEGRIIMSE  
DIGKDDGKLMWKKRSIVARKQLDDEEDKGNKVKISFHEGAQVKISRLMLESPPSTQHEEE  
AVNSIEKEPVEDVVVMDYAQPHRKPPIHNTKH

>GSVIVG01001306001 193

MSSLLLLLLLSLSMHACNARHLGVIGKENREVHLLSKGWVQVVEEADQVHKISLPPRLIP  
SMETAEKLPQQLPVGSDKRNPQENWGGVKNMIEIGSEALSKEEEDSKRTTTGSKIIVLSS  
HEDLQQATKATKIEGWKRHSRLMLGSAPHDVEETVDSKEGDIVEDIVVMDYAQPHRKPPI  
HNKDP

>Glyma.01G210300 150

MHARPVLFSLSLTIKDTTHKELDKFKLLETLTATSSIVKNYKLEANQPQQQKVNNNEINTC  
ESCSSVSSTLKETIVEAASVKIIPSDSGEHAAGTSFQMDSPSFLASQDERRHARSMLGPAQH  
NDEETVVTNASDTEEDIVEMDYAQPHRKPPIHNEKP

>Glyma.11G031700 166

MNSLSLSLAMLLLLCVSVHACSARSLYPSLTKKDTPHKELDKLKLLEALTASSTVKNYK  
LEENQPQQQKVANNEINTYESCSGASSTLKETIVEAASVNIIPSDGGEHATGTSFQMDSPSF  
LATQDERRHARSMLGPAEHNDEETVVTKTSDEEDIVEMDYAQPHRKPPIHNEKP

>Medtr5g012400 147

MASLPLLLLLLILCGSLHACTPRPFTEKDTTKYHFNKELNNVKLLETLTSSVKDNKLEENP  
ALQQKVTNDEINICVSCSSASTLKKVIVGSTFQTGTPSLLAAKDERGHARSMLGPATHHVE  
ETMVINTNENAEDIVEDYAQPHRKAPIHNEKP

>MDP0000154697 182

MEYMPHRVHTKYGRWWGKVDLSMSTKELHVTVLPCSFASFIPMSLPPTPLMSWVLFNLF

FGNXRGLNLRHGARATLLSVIVVEGHLQLLIVIRVNHASSKIEVHLRFLPTESGYRAYHSV  
EDVGNVLRSETSMSSTRPSISVEFQSKEVEVKDAETVPTLESXPNDGSRKQGHVNFPG  
TSAQDIFTFSQIHQKKSISEEIEYTIQGLERQTRTLLGSATLHDQMEEDKDPKGNEATEDV  
GVMDYAQPHRKPPIHNEKS

## Group 2

>Seita.4G052800 60

MSTPITGWGQSCVPEQRCIYIISGSNGSSPSNKDDSSSVFIIPSKLHYRTVPISRSLHRDQMK  
TSLPLVAAVIVLLLVMARVEGIRLDESHEAFSNQMVHKSGEMAVKNTDNEPSGEKMEESI  
SEEKDRVGHRLPEIHVDYYGPRGHKSRHH

>Sobic.010G062400 76

MMKNSLSLVMVIVLFLVTARVQGIRLDAESHEAFNKQMVDKPGVMGVRDTDNEPSGG  
KMEESISEEKGRVGHSLPEIHVDYYGPRGHRPTH

>GRMZM2G149126 44

MKKSSSPLVAVAVVIVLFLVMARVQGIRLDAESHEAFSNQMVVRKPGEMGATYADSESPGE  
KMEGSISEEKDRAGHGLPEIHVDYYGPRGHKSRHH

>LOC\_Os06g08130 24

MHKQIYATLYIPSETWMQLSRSRYTTSIADMSAAITRWDHGFASEANDKIEMKTSPLVAA  
VLALFLMAATVQSIRLDAESHSAFSKQTVNNTSGDNVAVVVAKTDGEPSPGEMEKAISEE  
KSRVGHELPEIHVDYYGPRGHNPRHH

>Bradi1g47720 87

MVKTCSPLAAAAALALLMFATARAIRLDAETNAALSNQLLNKSVDKGVMIKADGVEPSS  
SSGEAEETISEEKDRTGHRMPEIHVDYYGPRGHNPRHH

>Bradi4g16256 94

MKISSPLVAAAMVLLTVATVQGIRLDAEIIHAALSNQELNLQRSGDEGAVSSLDVSEEKE  
RARHREPENDIHVDYYGPRGHIPSHN

>LOC\_Os02g55580 25

MRMSKLSMATAVILLVVMAMEVEGIRLDAETRAATSNQMVNKSTENVPKDSGDSLGEA  
KRSIAGNEVRAVAHKLPEFHEDYYGPSDHTPRHH

>Seita.1G353400 63

MRTSVSLAAAVFLFLLLTAMEAEAIRLDAESRAAVSQSQQTVNKAENLVQKQEVAPGK  
SSVGESETKRSIAGQEVVRATTHKLPEFHEDYYGASVHEPRHH

>Bradi3g54310 90

MRSSSYLPLAAAAIFLLVLSRAMDQARAIRLDAETRASVSGSQTAIDKPIDNVVDKDSITTS  
VGDTKRRTSAAVAAEVRAVAHKLPEFHEDYYGPSDHSPRHH

>Sobic.004G333000 67

MRTTSTSLSLAAAVFLFLLLTAMEVEAIRLDAESRAAVSQQQQVNVANQKPSETLTTE  
KNAPGGERSSPAGESETKRSVAVAVSVAGQEVVKATAHKLPEFHEDYYGASVHEPRHH

>AC200065.5\_FG009 43

MQMRRTATASLPLATAAVFLVFLAATTVEVEAIRLLDAESRAAANRQQAIVPSASVLVTT  
QQQQQQHGRRQGETGLTRTVDPASREERSSSSSPAAAAAAGENSEAGRSVVAVAVAGQ  
QDQAVEAAHRLPEFHEDYYGASVHEPRHH

>AC202076.3\_FG009 52

MRTTTSLSAAAAATVLMLLLLTAAVEVEAIRPLEAVKPQQQANVAINVVSPPAAAFSSPA

KRSVSVDGQEVVKATLTAHKLPGFHEDYYGASVHEPRHH

>Solyc12g010460.1 117

MKQVILLIFLLYLSTLIHEAQGRHLKKGHKLQEKTNLIGSSKGVIGEVSTLCKDGHCSSTT  
KGRLTKVAKSHHWLPNIHEDYYGPRGHRPRHH

>Glyma.09G094100 171

MKPYSLVISLLLLSLFLTQAQGIRLEKGSFAAQQHKQHDQEESNLLKKTNNGANKEAIVC  
KDEQYCTGTLKKRASRVSRKPNQLPHIHEDYSGPRHHRPRHH

>Potri.006G059900 126

MRASLVVSLLLMLFLLQEAQGIRLEKGFMQVGAQKVQADQDNTSLKQISTGVLGEEVILC  
KEGHCTSTLKKRLSRSVSKKSSHHWSPRIHEDYCGPRHHKPRHH

>LOC\_Os08g07070 31

MKSSMVLASVILLIMAATAHGLRLDMGLHAALNNEGMLNSKWQSTANRPIDTRRASNDR  
RGPGRSRTRPPKMSNPHDMDPRFSEDYSGPGGHSPNHHRTTPCGPC

>Bradi3g16005 86

MRISMAPASVLLLLLVLLMAAMARGRLRLEMQLRATLGKEPASEWRASPGSRPMNKPRASN  
GGHADLGHKEEAIGATAALDAVKDTEVKRMKKMGSYPRFSEDYSGPSGHSPNHHHRATPC  
GPC

>Sobic.007G055400 69

MLSSMVFGSLILLLATRAYGLGRLDMMQRHTAQHQQLHKKVDSQKEEIQIPADFTWQRQPP  
SSPSGRPAAGVRDDASDRNGLGGGSTTPEHRLTTSTGRAAEKDGEAKKKKTTHRGP  
GVVAPRLIHEDYVGPSGHSPNHHRAIPCGPCKH

>AC204710.4\_FG003 37

MAFGSLLLLFLLATRAYGLGRQDMQLHTAHLPMNTKVNSQKQEIPADFKWQLRPPAGTL  
DSRRNGLGGSTTPEHRRLATTTGRAAAAKEEDGGGEVKKTMWRTHRREVAAPRFHQD  
YAGPSGHSPNHHRAIPCGPC

>Seita.6G049000 54

MRCSMFLGYLIHILLARAHGRLDMLLSALGKEEMPSALKWQRPPQPSSSAGGRSADTV  
SRATERHLMITAGAAAEEDGEVKKMRAHREEMAVRLIHQDYTRPSGHSPNHHRTIRCGPC

Group 3

>Glyma.01G136600 164

MSSTAYLLFFLCISLHACYARHLSPPNKKMEEKSHFSIKSDEKNGLDSSPKQLNEGHNKTE  
TRLVGDSVKPRNRRSTNHHRVHKATENASGSSLQKSLVSVSWRVPHNNKKPRQKHS  
GFDLDYSPPKTHPPHN

>Glyma.03G031600 160

MSSTAYLLLLFLGISLHACYARHLSPLNKKLEEKSYFSIKSDEKNGLDSSPKQLNEAGHNK  
TETRLVGDSVKPRNQSTNHHRVVKATDANASGGGALQKSLVSVSWRVPHNNKKPRQ  
KHPGFDLDYSPPKTHPPHN

>Medtr4g026350 138

MSSSYILLFLCIISLHACNARRHPSSDLDKKMEKKPHFSLKINVEKNAFDSSRKKLSEGD  
NKMKAEFVADSEKSKHQRSTNQKVLKDMRKVSAELQTKSHVSVSSLRVPHNNKKHSEK  
HPGFNLDYSPPKTHPPSHN

>Cpa.g.sc49.161 202

MSITSWLLLFLFLSLHSCNARPLHNKLQNKHHSSIKNQEKKAFFEEISAVELAKMRSSLSK

QQETTKGEEIETETQRITKARIAKTPKKIQGEKTSDNHQTESLVSVPWRVPHDKNRRREK  
NPGFNLDYSPPKTHPPSHN

>Potri.014G060400 121

MSVITYSCYFLLSILCISLHACNARPLADIDKKPEKKFQIISNQTSDQKEISVTIVSKADSSSS  
NEFGAAKEDSIAKTDQLDDNAQKLKDSRAKQKSMSDEKVKDSGAALKESLVSVPWPV  
QKKRGETHPGFNLDYSPPKTHPPSHN

>Potri.002G144400 127

MTPMRAALAFNLISIPLADINNNPEKKFHIIPYQNDQKEISVTTVPTVESSSSNEFGAAKKD  
SIAKTIGDNIAQKLKDSKAKQKLDSDVEIEKNPGAVKKESLVSVPWRVPQKKRGERHPGF  
NLDYSPPKTHPPSHN

>Glyma.01G079000 175

MSFTYHLFFICIFLHACSARCFSTLHNKLEKKPHFSIKGDEINGVESFCKHLAVANEVNYKI  
KPRKAKTTNQKVLKAIRKIQKPSKKDPGFNLDYSLPKTHPPSHI

>Medtr0377s0010 136

MSLRMSVTYLLFLCICFHAYCTQDMKLEKTPHFSIKADNINDFESIPNHFLMMNEGRKM  
KTWLVNTQKSKKELCTNQKVFAMRKDSSEINKLSEKNPELDLDYSAPRTHPPPHN

>Medtr0239s0010 140

MSLRMSVTYLLFFLCIFFHAYCTQDMKLEKTPHFSIKTDNINDFESIPNHFLMMNEGRKM  
KTWLVNTQKSKKELCTNQKVFAMRKDSSEINKLSEKNPELDLDYSVPWSHPPYHN

>Spipo1G0079900 81

MLPGSKDAIEKNTTTMQLQPTTENLSRLPRPADGGAAIRTEDGGPAAIEENLKAPVKASAV  
ARSQSHGAVSWRVPRDAQRGHPGFNVVDYDAPKTHPPSHN

>ATR0564G223 16

MANQRRNLTISPLLLILFLSLIVHTCSARLLLAASHAERVHHHSSKGREGESVRIHSNTIMK  
LLRKEDQGSRRKMGKSLSVVQNRSLTAVSRRSSRGKHGPGFHLDYSPPLTHPPPHN

>Glyma.08G232200 158

MYLPSSLFIIMFFFLSLNVCTARPLVVAVEEASNTTQINISRKVSENVKKQPLELNGMTSEGI  
NAKINNMGAEREESSEHTMRKVHPNKALGFVPVKPLAVLVSWHVPHSKHDQNPGFHSDY  
ARPRTRPPSHN

>AT3G60650 108

MNTNSYSMAQDNEEITKLEAPSTNKTNTLLSQSHAVVNHGDNQINGKKTKEIHRVKRA  
SDKKVSSKRVSRWKIPKYPPKKQPKSDQEHPPGFNLDYMQPTTHPPPHN

>Potri.003G109500 132

MPIKSFLLSIFLLSLSMHALCNARNIGFVKEGFHAEVYFSAKVGEKVEHSMDSVHGTNDR  
EDISEKSTPGAAITQESKDSKAITKSSGHDQNPVKPLVPVSWRVPHKNLHQIPGFQSDYAM  
PRTRTPSHN

>Cpa.g.sc3.318 200

MHSTISTLFVFLFLLSFFHACAARHFRPSEDSSSTCSKGFENVNHHQQKIDPLISEEDDDGQE  
GTDAGAMMQEEADKETSSSEFINGVKKKMSNKGEISSGVSWHVPRNNHHNELIPGFFSD  
YSNPRTRPPSHN

>Medtr8g446520 142

MYLQLCIFILLLSLNVCTSRLLGVKDTQINISEKESENVKLPKLSNGATKTDIKVRNNNI  
GVVQVHHIKQEISDHDHPRKEGKNPGFYSDYSRPRTRPPSHN

>Solyc01g090960.1 111



MSITKITTLMMIFLLFHACNARSLGIMNKNEEKNVARVPSTPSDVKAKHSPSKPNKSVK  
ENDEKDDHHYGVSVSWKVHQQKKEDPPPEFNLDYLPARTHPPVHN

>LOC\_Os04g46850 32

MLKLTAAVAALLVVFFALFVGSCEARRLRALGRVSSLKPSSSPPTYKDAASMKLHGS  
DPTNQKKDLSSMDHHMASGDDAKAKDGVAMASPGAVQTTIVVRVSNRLSHQERRVD  
TAFHLDYAGPRTHPPSHN

>GRMZM2G162271 51

MPSGLNSPLLLAPKGQLMKQNTAVLLLSIVLLATSCEARGLPVHGKVVRRSSASQSHRLPAG  
KDVAATSLTADGWLSTRQMEARHMTAQQADAKVKEGVKMAAASAAAGAVRATLPTPAV  
TAVSQRLPRREDTGFHLDYAGPRTHTPSHN

>AC231226.2\_FG001 47

MHSGLSSPLAHKGQLMKHSAAVLPVFLLSIALLASSCEARGLPVHGKVRSSSKSHRLPLPS  
KDAAGASLKADGRLTRQMKARHTAQPEHQAGATAKEGMKMAAASAGAVRAAPTPSAVT  
VSHRLSRPEDTGFHLDYAGPRTHTPSHN

>Sobic.006G172800 70

MPTGLSSALLAPKGQLMKHSTAVILPVLLPIVVVLLASSCEGRGLPVHGKVRSSSKSHRL  
PGKDVAATSLKADGWLSRQLMEARHMMMAAQQADAEVKEGMKMAAASAGAVRATATPT  
PADTVWQRLSQREDTGFHLDYAGPRTHTPSHN

>Seita.7G193200 57

MPSLSSPFAPKGRLMTSKHAAAFLILLSIVLFASPCEARGLRVHGKRRSSSKSSHLPAGK  
VGIWLLMRKWLVLNVAATSLKADGWGTRETQARSTVHTAMDDDMMAQPDAAKAVGV  
AMASSTSAAGTVGVTPVVRALSQREDTGFHLDYAGPRTHTPSHN

>Bradi5g17935 95

MPTFSSPLPPKTRQLKVTAATPTTVLITLVFLALFVRSCEPRHLLPHGKDSSSRSPPPAPCKA  
DGSPINQKKNLNAVDATGTLVDQVDAKVKKGVPMAMASSGAGVQTTIASRVSRRLSQR  
ELQGEGETEFHLDYAGPITHPPSHN

>LOC\_Os02g44340 35

MPSQSSPQTLNGKLKLNTSTTILLFIVFLFTLCIISCEARHDHLRISDKYSSKKSSLVPKDVA  
GDDVVGSKQPIDQSVGKEVTLNAKMELAASSGGVRNTGPAVRVSQQLLRHRKHEDDQGI  
HLDYAQPKTHTPCHN

>Potri.001G123900 129

MHSFKSSLFIFLLSLSMHAICNARNIGVVNEGFAKVLFSKVGKVEHNTDTVHGTNDR  
EGAIRGKSSAPGAAIMTRESKDSKAITKSSGIQILKSLNGLVVSLKAVNIEGYSTRRLSVA  
GFGSNNVKKAMESGENEVEEDAEVIDYEPHRTPIHNRKTLVIAV

>Seita.1G262800 59

MPFSLTYPCILRDHYKQPHHSSMFSPSTLALKGQLKLSTTTTVLIAAFILTLYINSCEARHL  
RVHGKDYSRMLPASSPPKGVTGKGASKGMRSSSEVPVGSNMDTSMGNEAVIAAKKE  
MASSGDSCRGLRKRSEGMKVRSSLRERSVLGAESNSELIVGSNTTTAYTAETLVAMDYL  
DAHPAPAVHNR

>Sobic.004G291300 78

MFSVSSPKGRLKLSITTTDLLVVFILTLYVTDCEARRDLRVHGKHKCSSKLTSSPPKGVIDG  
AAGKGNVRSSEIPVGSKVDASMLVNEGVTAAKKEVASSGDSCRGLSKAVEAIKVRPSI  
GERSLLGADGSNSELVGSNMTAAAYTAETLVAMDYLDHPAPAVHNR

>Bradi3g50917 85

MFCLSSPPLALKGQLKLTSTTTTSTILLVFFLFTLYITSCEARHLRANSKGSSNKYTLTSKDKA  
AEVGDTEKQIRTASMVHGTGKTGVIAGSTIDQSMSTGATLINGSGNSSRGSNGQQRGSKA  
TTAYTAGTLVAMDYPVARAAPAVHNR

>PAB00035086 10

MILTSSRSLEFLRSMILYKVVMAILLGLSFLPCKSSKLNGEDSVIMFQLHRQGSSVHSLVR  
APGGDDTIRPQRPVVIKGFPTSFTGKRRMLGENFAEKNVREDEKSLSRAHNRNLEGS  
HENKVERPDHHHHHRRQHRQAGHEAIFFRSKKRHLQVSGSTTVIVHEESSRTEWNSLA  
AKKTNTVAWHKPGEKYDEPTFHVVDYSGPKTHPPKNN

#### Group 4

>AC187899.3\_FG002 46

MLLAYVLVFLRLSASTCHATSRLNQHLFAGRAGDSTAPVHHRHTTKVLSDYNDVHYHP  
AMMPSPASVELAGGIGGSPPPSLSAVEPSGVEGAPPPPGKRDTAPAMEPSPSPHSEGGAS  
SSGDDASATEQEDSAGYDLDDANVDYVGPKTHPPSHN

>Sobic.007G044000 75

MLLAYVLIFLLQLSASTCCYATSRNQHLFAGRATALLPPAAAIHHHHHHHRHTAKQAAEAR  
AHAIVVDMQVLSDYNDVRRHYHPAMMARWVGVGAPPRPPSTSPSVELLAGVGGSSSPPPP  
PSLSAVEPNAVEGAPPPPLMPAGKQETSAAMEPSPSLPHGEGASSSDASEMGHEESPSG  
DDVDVDADYDGPMTHTPPSHN

>Seita.6G058000 62

MLLAYYLLLFLHLASTCDATSRNQHLFLPSAIIHDHRHAANKRGIYPCMQDLSYYDAH  
YYPAMMARRGGPPRPSPPGVVASGVEAEPPPSLPGVEASGAGGGGCAPPPPEKEASAA  
PSPSPRQVDDGGGGEQESATDDVGVDYAGPKTHPPSHN

>LOC\_Os08g05950 22

MRCSCMVCLLLFFLLHLSVCHATSRLNHRRLFAAAPASPSTAALYGDDDDITAAMHVWRSP  
RRYMRAAAEEQRGSPAPAPLPDGAALGLQPGGVEGAAAEARTTEEEAAGAGAAMAPFPAA  
ADVGGKDDDDSGGGDGAADDAGVDYAPPKTHPPSHN

>Bradi3g16657 89

MQGRPAAMILAMAYLLLFFFLHFSSSTHGANLPATAGDPLLSTMAHRLLRSMMLQQHS  
YVPDETTTMIQQLLGGPSRPQPGGGVPVSPLGAAAAEQTPKMAPAPLPRGPTTADLITDD  
RPGRGEVDIGVDYTPPKSHPPQHN

#### Group 5

>LOC\_Os04g40640 26

MRLLPASGIVRLVALVFLIFSSSLQQAGVGAIRLHDRKQHGEQWEEERTQMRSFMTMD  
YSSVRRRRPIHN

>Sobic.006G124200 73

MVSLGIVRLVALVLLVFSSSLHQQAGVGAIRLHRRQHAQQWVEERNQLRSYMTMDYA  
PWHRRVPKHN

>Seita.7G141500 61

MALLGVARLVALVLLAVFCSSLHQQAGVGAIRLHRRQHAQQWTEERDRFRSYMTMDY  
HPWRRRVPKHN

>GRMZM2G022255 48

MVVGIVIRLVVAFVLLLVFSSSLHRQAGVGAIRLHRRQHAQQWAEERNQLRSYMTMD

YAPWHRRVPKHN  
 >GRMZM2G041513 50  
 MVSLGIARLVAFVLLVVLVFGSSLHQQEGAGATRLHERRQQHAQQWAEERNQLRSYMTM  
 DYAPWRRRVPKHN  
 >Bradi5g13666 91  
 MRLLLGIVRLVVLVFMVVVSSSDQAVGVGAIRLHDRRTHGEQWAEERKQMRSYMTMD  
 YTPVHRRTPKHN  
 >Bradi3g47791 93  
 MRFLGLVSLVALIFLLSFRSLLHQQAFVEAFFPSVQGEGAAAIHDDSKKRQHAEWAEDR  
 KRMRFMTKDYGMPPRHTPRHNRL  
 >GRMZM2G121160 41  
 MSPCPCIIICSMHACAYSLLRQSEMRLVGLVSLVALIFLLSFRSLLHPQVLADGSAVTVT  
 SRRDRSQQHAEQWAEERKRMRFMTDYASARRHTPRNNRLDP  
 >Seita.1G219800 56  
 MRLVGLVSLVALIFLLSFRSLLHQQVLVGEGAAAAANGCHGRNRQRHQHAEWAERK  
 RMRWFMTDYARARRHTPRNNRLDP  
 >Sobic.004G203301 77  
 MRFVGVVSLVALIFLLSFRSLLHQQVVVGECSAVAAVARS GGGRHRHGSRNQLQQHAEQ  
 WAEERKRMRFMTDYASARRHTPRNNRLDP  
 >LOC\_Os02g38330 30  
 MRFLGLVSLVALIFLLSFRSLIHHQQVLVGEGAAASGFLHGSDDGRRQHAREWEEERKKM  
 RWFMTDYAHARRHEPRNNRLDP  
 >AT2G03830 100  
 MKLIRVTFLCALAILLVTPSSLQLKHPYSSPSQGLSKKIVTKMATRKLMIISSEYVMTST  
 SHEGSSEQLRVTSSGKSKDEEKKLSEEEEEKKALAKYLSMDYRTFRRRRPVHNKALPLDP  
 >GSVIVG01003987001 196  
 MICLSLLSQSQTAAARPHFSGLMGLQDPPKQIRRLVKDQLPVPWWSEDYTAARRRQPV  
 NNKLDP

#### Group 6

>Glyma.02G122800 151  
 MELIIITLLSFSFSYLIPTCSSSQIQLEPSLQLEDDNIGVNTNLQLSLPTVPRKLRFTEKVKED  
 DGARDLASHKQENSFAAGKQYHRKQNMVLGKKGTRQEWMEDDPSQYFTMDYTRV  
 RRRRPIHNKQLPVNP  
 >Glyma.01G065000 161  
 MELIIITLLSFSFSYLIPTSSSQIQLEPSLQLEDGNTGAVVNTNLQLSDLPTIPRKLRFTEKVK  
 EVDEARDLASNKQEGSFASGKQYHRKQNMVLGKKGTRQEWMEDDPSQYFTVDYTR  
 VRRRPIHNKQLPVGP  
 >Medtr5g048090 137  
 MELIKITFLCLFFSSLLVESHPFHHQDQQLSLPILHRKIMFTEKVKESDEARHLVSHKRKD  
 SLPAGKQNMVSGSKGTRQEWMESDDPSQYFTMDYNRVKRRRPIHNKQLPVGP  
 >Cpa.g.sc1.170 199  
 MEKIVICLACMSLLLLLIEPSSSLQLIHLQIPLYQQDKVFLSRKLKFTDEVTVKQHEsqDAT  
 LNTDQHKRLPSGKAKQKEESMKESGRQGRWIEGADASQFFTM DYTHVRRRRPIHNKSLP

## VAP

### Group 7

>Sobic.006G112000 74

MVSFIRRTSAMGLVVVILLIVSLLTIHLPAACARHVVVVLNPDNNGLNNRGNKNLGKALAV  
TDDDDLAANKVISGRKLGAPNNKEGTKATVGATTAAAAAATSAGSRPRTVKMRAAAR  
HGDAVTEMYDMLRRDYASRASRRRPINNGATPLQVNKKP

>GRMZM2G050458 42

MMSCTRRTSAMNLVVVTLLIVSLLTVHLPVAVACARQVAVLNPYKNELDNRGKNLGAAL  
AATASTDDDDGLAASGKVFPGRKLGAPNKEGTKATVGATTTTSAAGSRPRTVKMRAAAR  
HGGDEATEMYDMLRRDYTSKANRRRPINNGATPLQVNKKP

>Seita.7G129500 65

MSRRRTSAKSLLALVLLIIVSLLTLHAPIAFARHVVVVLNPNPDGVNNRGDSKNLSKVLASAS  
TDDSAANKGVFSGRKLGAANKEEGITKATTGATATATASAGSRPRTVKMRAAWKHGDAA  
AEMYDMLRRDYAWKASRRRPINNGATRFQVKKP

>GRMZM2G364839 38

MSCIRRTSAIMSSLAVSILLIVSLLTLHLPIACGRRHVVVVLNPSDNGMMNSRGKKVSSTVG  
AAAAAATRTVKMRAAVKHGYAVAEVYEMLRDDYASKARRRRPINNGATPLQVNKKP

>LOC\_Os04g39230 23

MSSRRTSAANLLAVALLIISLLLLPLLHLPVAHARHVAVLKATDSSSAISIRSGHVEPTPASGA  
VQRRPASSGASNRGGGRRRRRAAASSRSTVEMRASAWAKHHRDEVARMHEMLKRDYAS  
KARRRSPINNGEPSLEEEDLP

>Bradi5g12825 83

MSSRSSRSTSTVVGLLVALLFSTFLAPHLPAASARHVAVFKAKDDATGQAEAAGGRSSRP  
GRTSTVEMRGDAWAAAEMQDMLKRDYAYKARRRSPIHNDEPLQENDEP

### Group 8

>MDP0000215329 189

MEFSYCLVFVLVSAASIWNISANSRHQLGENAVVPNDVSILKGEDIDHHQVVSPTATKED  
KRIGGRKMAAARLEKDVKVVAEGGVSGTRRSNSDLEGQSSCGNVECRQSTTESRFSEKI  
VDHDHEHAGFVAFSQDYNSPRHHPPKNN

>MDP0000322433 181

MEFSYCLVFVLVSAASIWNISANSRHQLGENAVVPNDVSILKGEDIDHHQVVSPTATKED  
KRIGGRKMAAARLEKDVKVVAEGGXSGTRRSNSDLEGQSSCGNVECRQSTTXSRFSEKI  
VDHDHEHAGFVAFSQDYNSPRHHPPKNN

>MDP0000259300 185

MKFSYRLVFVLVSAASIXNISANSRHQLGIYFPFFFCVIVHVFPKXLKKGENAVVTKVVST  
XKVQRQDIDHHEVVSPTATKKDXRIGGRKMAAARLEKDVKVAVDGPIRGTRSSKTLSSS  
SDLEGKSSCGNVECRESTTASRFSEKSVVDHDQEYAGFVAFSQDYHSPRHHPPKNN

>Medtr8g066030 144

MACILLVLLCASWLSNARLHPQGGVVEVNGISSTKANVTTAIDGKNESVNSPSRSSFHGK  
RSLRTHLSDDSGFVAFTTDYHPPRHHPPKNNK

>Potri.008G112400 130

MAASPVKFTCLLLLLLFTSAWLNSARAHPTVEVDTFSSERIIVDGDGMVTTSIKKIGGRKV

VRAHNIKRPDIKGNVAHGGTSRISSANDQVVGKYGYEREVMDIGNKRNGGRFPEGVKES  
GFVAFNADYHEPRHHPPKNN

>Cpa.g.sc998.2 203

MKFVCFLLIILLFSTLPTPSFAVELHPADENTGTGVENVKIVGNRKMYVDGVMKIERKEITES  
VIDKRGIMRMMHEKCKKAGNHCEEKSDDGGFVAFNADYHAPRHHPPKNN

>Glyma.02G124200 172

MVLIKKSACVVLVFLCAACLSTARLNPKGASVNDIPDIKASIATSVTKSTMAAIDEDNLNR  
PSEKRLMSKSGKVISAPNVEAKRNNARSCLSDEVNEDPLAFTADYRRPVHHPPKNNK

>AT1G13620 96

MTNITSSFLCLLILLFCLSFGYSLHGDKDEVLSVDVGSNAKVMKHLDDGDDAMKKAQVR  
GRSGQEFSKETTKMMMKKTTKKETNVEEEDDLVAYTADYWKPRHHPPKNN

>AT2G04025 102

MTTLSKILCVLIILLCFSTRYSLHEDGNQQSSRDFVSTAKAIKYGDVMKKMIRGRKLMM  
ASGEKEEAETKMKRGNRETERNSSKSVEEDGLVAYTADYWRAKHHPKNN

>Solyc04g005240.1 112

MLVPRRILSLLLILILIAQILPNTTSNYQGGKIATKRSNSVSKREALANTGGEQILSRRPLSQS  
GGKDINAIEYVAFTADYKSPRHHPPRHN

>GRMZM2G096431 40

MAPMFCPRAGGVEANRNAETMARMLLAGKSQKTVLAVSPELLSVTGSKGGADIKLELSV  
GKIRTGEETARSNVLTGRRLAFGDVMEQKETENSGIRTDGAKYAVGKCGHGGGKDL  
MNCSKHTPKVYFDGHIPTADYRSPRKHPPKNN

>Glyma.17G082400 159

MVSARSTTFLLVFILLPLRFSSAHTQHQQGKTPVVAKLETKRSPVKVEIHHGVPAVAETDQ  
RNRLLPGRKMMSKGVISKLINAVDSNGINMAKGVTTKGKARCLNGNCKRETGKRILGL  
KHKDRKRSNIGRSTKAKMSGVLPLNADYYYVPRPHPPKNN

>Glyma.05G017600 173

MVSARSTTTFLLVFILLPLRFSSAHTQHQQGKTLVVAKLETPRCPVNVEIYHGVPAVAETN  
QGIRFLPGRKMMSRGVLSKLVVESENGTNMAKGLTTKWALCLIGNCNREKGKRILGL  
KHKDSKRSNGRSTRVKMSGVLPLNADYYYVPRPHPPKNN

>MDP0000620898 178

MASFKLITFVPVFILLHLIQSTAHTHGAMNKVVLAADETGHLVVLRRSLVDVEXEIHGVP  
AAVEEAEDTRIGGRKMMPERNLGMVKVKVLKSNGERRLRSASSSGRVKVKIPGFIPFDAD  
YHVPKPHPPKNN

>MDP0000295005 190

MASFKLITFVPVFILLHLIQSTAHTHGAMNKVVLAADETGHLVVLRRSLVDVEXEIHGVP  
AAVEEAEDTRIGGRKMMPERNLGMVKVKVLKSNGERRLRSASSSGRVKVKIPGFIPFDAD  
YHVPKPHPPKNN

>Bradi4g32950 88

MRCAGSVLLLLLLSLSAALTAEANMEGLNGYNAAPSLPGRLLRERRAMAALAHGGGGP  
EKKNEVVEERKGEENTVANKAHVHGGEKTVEVTTVVGLSGESSGKKNEGSKRKFAQV  
LSSDYRIPKCHPPRNN

>Spipo12G0015500 82

MAALSLTGFLRLLLFSIALRQAIADRRVTETGAIADIDRALERSPVSLSTFTTGIFLLFV  
SRLIGFSRYQQRGRHVVARAGPEANGMKRMEGGRRPGVDCGRREVGLNVECALRGRR

RHSGVNFVDFIPFSSDYRGAKTHPPKNN

>Zosma93g00670 80

MVIATNLRLMILYYLFLSSLSETTGAIEKAPMHPQDCTNKENMQNLWGSHGSRLMGGKR  
SDAESLSDVIVVEVKEETKKKLKVKKHSTTANCYHRKGMLNVECELRDVVPSTHYNLP  
FTSDYRDPRTTHPPKNN

>Sobic.010G199500 68

MTDIPKSRKQLVMQPLNCISFLLGLAILSATLGPVFAIAHRELLSVTGSKGGAEIKLELSV  
DKIRTDEEVRSNVLTGRRMAFGNAVMEQKETKNSGSRSSGENKNYSTNSHVPSTNIKDSS  
SSGMQAGPSRNRVKLEGSTSVTALSNPNPQHLRTLPSKHLRNSNSGSKNELRDSVVHRTL  
YKEKMLEASDEVKFLNKDYHASPDKRKPVHN

>LOC\_Os06g42754 28

MTDIPKSRVRQLVMQPLNCVIFLLGLAILSVTFGPFVTIAHRELLMATYSEKGPENKLDHG  
VDETRTYEEIKSKIFAGRKMAFGVAVMENHPKDARSKPSSGEISNYSSNSRVPSSSLKDSSSS  
TMKARPSVDNIKLEGSTSEQTLNIPNPQHIIILPFKPYRHLSLGSKKEQKGSSICCNSTRTN  
EDWKEKMLESRDEVLRLLNKDYHANPHRRPPVHN

>Bradi1g35510 84

MSTRHYKSTVLCCAFSPFLSVTRQTYQRTVPPLVMRSLKCVSFLWVILLATIGSFGTT  
AHRELLMATRGVETKLVRTELTVEKTNIDEEIRNNVPTVRKMDFGTADANDARSIPSSGDI  
KNNSTNSCAPSSVIKDSGSSRMKARPSMGSIKLEGSISGQVLNPNPRHIRILPSRNPSSGSK  
TELEDSIVPSTLYKNNDDRKHKMLEASDEVKFLNRDYNRFPRRTPVHN

Group 9

>GRMZM2G065781 53

MRRQLKCVGLLLLLSLLLPAVSPVVVATARRELLPLMATGDEGRPDVSSSGTWMPPGA  
AEEAVVRRKDEAMKTNGRRFRRTSSWNWKKMPAAASQVSFGGRIPFTADYHSVHRHPPT  
HN

>Sobic.004G074100 72

MRRQLKCVVLLSLLLAALSPVVVATARRELPLMAATGDEGRQDVSSSGTATAEGGAE  
VVIVRRRDEEAVKNSRRRFRRTSSSSSGKQMPAASPQFNFGGRIPFTADYHSVHRHPPT  
HN

>Seita.1G055100 64

MRRLISCVGLLLLLGALLAALSPAVVATARREMLMAASRDEGRGAAAVNILGNAPPPPP  
ASANGGEDVIGRRKDEAVVARSHRRFRTRRIPASGSQVQFGGRIPFTADYHSVHRHPPTN

>LOC\_Os02g09760 33

MQQLNWWVSLLLLLFFMVAALSSFVATAHRELPMARKVDEIGDHLQAKLDNQASSVSVTR  
ATAKAEDHDQEAVMRKCKNGRKNCKNFRTKLPADADGKIHFDPHMPFTADYHSVRRH  
PPSHN

Group 10

>Seita.2G241700 66

MRCAAVLLALLLSALSASTAEAHEERLDDDAVLLSGRRWLRGRRIIAATGHGDAGKKD  
EVVEGKGAKSTGADQEADAPAEAVHDSGKRSKGSATHAMFQAPRQGDAAVPEVLGM  
DYNKYLDARHHRPINNDAPLEDLAKKP

>Sobic.002G235800 71

MRCAGVFLALLLSLSALSASTAETHERLGDAALLTTGRKWLSGRRTLADARKDEVME  
QGRRGAKSTAGTNQEADAPAEAVHDSGKRSKKGSATHATFQASSRHGGGGSDASEPEILG  
MDYNLNLNPRRHRPINNDAPLGLGELAAKTP

>GRMZM2G137551 36

MRCAGVLLPLLLLSLSAASTAEAHKERLGDAALSTGRRWLTGRKTLAAPGRDEVVEG  
AKKSTGANQEADAPDLRKLYMARVICLYCQAAISFQCKRSEGPVTHATFQAPRHAGGGG  
GGTDTSAPAILAGMDYNYRLDARRHRPINNGAPLVELAAGTP

>LOC\_Os09g29870 21

MRCAGVLLLLLLLLLSLSALSASASEANEERLLRENAMPITGRKWLRGRKAMAAAGRLGHG  
GVVVVEGKGGGEEKNKKNTGANTAHVHNGSERAVDVAVVGKSGGKHGKISPLNEGLK  
CVISVPGAANQEADASAKAVNHEEPSKHDDTAAAVSRMMSMDYKTQDARHHRPINND  
APLDHELVEKP

#### Group 11

>Glyma.08G253200 156

MKRRNTDQMMKITLLSTLLLGCLLVMTVQGDSSAGVVPVAVTVVEEGNKNKLGVSQKEP  
FVRSGAGHVRKLGGLGKKFGTNEVTSVDSKNGKGAYGGETSKISGKDDDGKSSGSRD  
QKNDDQKLMMMGPKEYLKSTKFFVPPRIPTSTYPKSCSQDCIIVPVKSSLGSSSSSHEH  
QISEETPQKDETQRFADAAKEIANMMNKDYHGRPSHRPPINNNEPRN

>Glyma.18G275800 168

MKRRNMDQMKITALSIFLLGCLLVMAVQGDSSARVLPVAVTAVEVGNINKLGVSQKEPFM  
RTGAGHHMRKQGLGGKKFSTNEVTSVDSKNGKGADGGETSKTSGKDNDGLKSSGSRD  
QKNDDQKLIVMGPKEYLKSTKFFVPPRIPTSTYPKSSSQYCNIAPVVKSSLGSSSSHEQKI  
SEETPQNSTQKDETQRFADAAKEIAYMMNKDYHGRPSHRPPINNNEPRN

>Medtr7g017380 146

MKFIFILLSSLLLGGLLILTFQRDSLARVVSGQEWNNRLEVAEITAISQKEPFQRITGFFH  
MRKLGFGTIMHHEETSVDKNGKRETSKISGNENDGLRKSFRSLFQVKMNDAAQKHVTM  
KANTKFAIPRNSLTNTNTKCSQNCDDVPIKGSPESTRSIQISEEAQSIDAAKEIGSLMYKD  
YSHKGKPSHRPPINNHQPNP

>Potri.004G112600 131

MVYKRFLGLALGLLFVMNAIWGSCAYDYHDGEMKKKEIVGFGENTVLSVDKELILSGFS  
TASTRKMGLGGRKMAVQKESRRETEKEQGLHGQASEDNSGANYSNVKCDFQVKGSDFN  
QKMSNLERETLSARLGTPTDQTVHLPKSNKDSKALPTKTSLESPPRADIDQEPQGSAT  
DLKSEMQRLLDATREMVNLMNKDYTIKPPKRKPPINNKEPIH

>Potri.017G102200 133

MVYKRFLVLVLELLYVMNAIWGSYAHDHQDWEMNKYELLGPEEIDVPAHKELNGFSSTA  
STRKMALGGRKMAVQKVTRREIEKEQGLHGGAPEDNSGANYSNVKCDFQVNGDFNVRC  
KLRAKRNSPKMIKGPNEKNALDESLGGSNDQLNNIKQKDMNNLERKTLARLGTPTRE  
TVNLPKSDPELSQDSKALPTKTSLESPPPTDMDQEPQGSSTLPKGEMQRLLDATKEIVNL  
MHKDYSGHARPGRKPPVNNKVPIH

>Cpa.g.sc14.249 197

MADCGKLSDGTRSPRKVLQDRVNDKSGVLETEPLKSVGLRTPRRSSMSDQQEETDCLQT  
SAEAKRLLERSKEIVSLMHKDYSGMSKPPRKPPINNNEPWH

>MDP0000264944 191

MMLXLTSLVVGLLFGMXALGQFSTAHAHQGKEDISMTGKRAVLDPDQKEPNVDGISIAGSR  
MIGLGGRKMVAHRVLRKSEPVRPDGQQNEEASTTSKNPGANRSTSDGNCNFEGREDLNV  
KCKLGDRDKSKDNPKASSNFSGKLQNQMNNQDXVKILELTTLKSTSAGSLEIPRDLIPNHS  
EDFKTKHPTTEAQMTKSYDEKDDHKLTDNEARSLLKATREIANLMRKDYHHQMGRKP  
PVHNLQPRP

>MDP0000280679 180

MDGSGESSESVSAXTNSKSMGNGVSSVDDRCPKQVSPLRGGGSRNTSPVGCVRSRNTSPS  
RQKVVKTKPRGLDEETASTFGKPVHPDVQMEDNIWAMPLPEDLLNEILARIPPFMIFRLRCV  
CXRWNTILQDRSFLKFHSQVPSHGPCLLTFWKNSTPQCSVFSLPLKTWYRIPFTFLPQWA  
FWLVGSSAGLVCFSGLDGLNFRALVCNPLTQTWRTLPSMHYNQQRQLIMVVDRKDRSFK  
VIATSDIYGDKSLPTEVYDSKLNWTSIHQIMPAVNLCSKSMAYCDSRLYLETSLPLGLMMY  
RLDTGYWEHIPAKFPRSLLDGYLVAAGTXKRLFLVGRIGLYSTLQSMRIWELDHAKFVWVEI  
SRMPPKYFRSLLRLSAERFECGQDNLICFTSWNQGKGLLYDVKKVVSWIAGCALQSY  
NSQVKAKKKLNTMMLQLTSLVVGLLFXMHALGQFSTAHAHQKGDISVTGKHAVSPDQ  
QKCKKLSGEYXNSERFSCSIXFKXIYKLTHISMQEPNVVDGISIAGSRXIGLGGRKMVAHKV  
LRKLEPARPAGQLNEEASTTSKNSGANRSSSDGNCASFEGKGDNLVKCKLGDRDKSNTSTT  
SSKKYSKARIILKLQAIPMEKPQNRLNQDDMKILELTTLKSTSAGSLEIPRDLKPNHSQDF  
KTKQPTTKAPKTICYDEKDDHKLTDARRLLKATREILCVLPKFLSVEKIFIVPRTRSSKNE  
LSVTGNGPSDQQEIIHGISLAGSRMIGLGGRKMVAHKVFRKLEPXRAVGPNRDTRSSTTS  
TNSGKESADACGETTKYDETDDPKLTEETRLLKATREALNLMTKDYQGRDRRRKPPINN  
HEPQH

>MDP0000287307 186

MAGTCCELIWLRFHRFVSEGSYVYSPFAGKNELSVTGNGPSDQQEIIHGISLAGSRMIGL  
GGRKMVAHKVFRKLEPXRAVGPNRDTRSSTTSTNSGKESADACGETTKYDETDDPKLTEE  
TRRLKATREALNLMTKDYQGRDRRRKPPINNHEPQH

>Soly03g114700.1 113

MVSLSFSSFMLVMLLFIFLTIKDTIAHTDDQAKQIVHEAENYNASDLKSYLSVKKKVLESV  
PAAAAFRLGGRKMMIERTKDMKEVKKGESSGAASVHSVGNLNYRKGQGKLRMSGN  
YNRPLGHDSRKNLHYQGNESDSMNSASTHNLKNDDQSDDNGSFQKIESEKLVDDMTSELF  
TMMNKDYVGGPGSGSKPRHKPPINNFQPLHRNP

>Soly02g089300.2 114

MVSLGFNIQLVLVIALLLILQPQQHTSANVLFGKLRKKEWLKFTSIEKDHDHSHVDGIVASAG  
GIRKMLVYQFSVKGDAGFDSKKTSHMNVQADIKKNHEIGKKEESKEFVDVEDEITKLLTK  
DYSGRSKPRRSKPPINNHKPTD

Group 12

>AT3G02240 103

MEMKKWSYANLITLALLFLFFIILLAFQGGSRDDDHQHVHVHVAIRTKDISMGRKLKSLKPI  
NPTKKNGFEPDQGSQSHDVQEREVYVELRDYQGRKYKPPVHN

>AT3G02242 98

MKKWSYAKLMTSALLLVFLSIILLAFHGGSRGDNHLYDHVAIGTKDILMGRKLKDLKPKT  
ESLKMINPKKKNGFESDQVSSDLRQEVFVDMMARDYQGPKPRSKPLKNN

>AT5G15725 97

MKKTSLKMLTLVLGFCFVIYLLQGPRGGSRNGLLIARKLISLEPIETKNAARSLKDSISTD



LEEEVDRLMEHEYSPVKPRKRTPVHNGVRNRH

Group 13

>Glyma.13G102700 177

MMSSSIFLLCCLLIFSLSLSQHTGYSLDATPTRKLSMPAPVHDHKTQHMKMQGAEKAMES  
TPANEDSMTPDYTSNSYSPHDLVFHIDYHGVTTHTPTKHPKP

>Glyma.17G056400 174

MSSSIFLLCCLLIFSLSLSQHTGYSLDATPTRKLSMPAPVHDLKTQYKMQGADKAMESTP  
ANEDSMTPEYNSNSYSPHDLVFHIDYHGVTTHTPTKHPKP

>Medtr4g126770 148

MGSKPDFHHMMSSSIFLLCCFLTSLYSISQHTSNTYSLGFTPARKLSMSAPGHDHKFHET  
QVSDEAMESTPANADLTITLEITGNSYSPHDLVYHTDYHGVTTHTPTKHPKP
