# Supplementary material for: Evolution of RGF/GLV/CLEL Peptide Hormones and Their Roles in Land Plant Growth and Regulation
Source: MDPI journal article supplement (doi:10.3390/ijms222413372), 2021-12-13
Supplement: s1 [file s1]

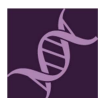

Supplementary

# Evolution of RGF/GLV/CLEL Peptide Hormones and Their Roles in Land Plant Growth and Regulation

Yitian Fang <sup>1,2</sup>, Jinke Chang <sup>2</sup>, Tao Shi <sup>3</sup>, Wenchun Luo <sup>2</sup>, Yang Ou <sup>2</sup>, Dongshi Wan <sup>2, \*</sup> and Jia Li <sup>2,4, \*</sup>

<sup>1</sup> State Key Laboratory of Microbial Metabolism, School of Life Sciences and Biotechnology, Shanghai Jiao Tong University, Shanghai 200240, China; fangyt@sjtu.edu.cn (Y.F.)

<sup>2</sup> Ministry of Education Key Laboratory of Cell Activities and Stress Adaptations, School of Life Sciences, Lanzhou University, Lanzhou 730000, China; kingco\_chang@163.com (J.C.); luowch12@lzu.edu.cn (W.L.); ouy@lzu.edu.cn (Y.O.)

<sup>3</sup> CAS Key Laboratory of Aquatic Botany and Watershed Ecology, Wuhan Botanical Garden, Chinese Academy of Sciences, Wuhan, 430074, China; shitao323@wbcas.cn (T.S.)

<sup>4</sup> School of Life Sciences, Guangzhou University, Guangzhou 510006, China

\* Correspondence: wandsh@lzu.edu.cn; lijia@lzu.edu.cn

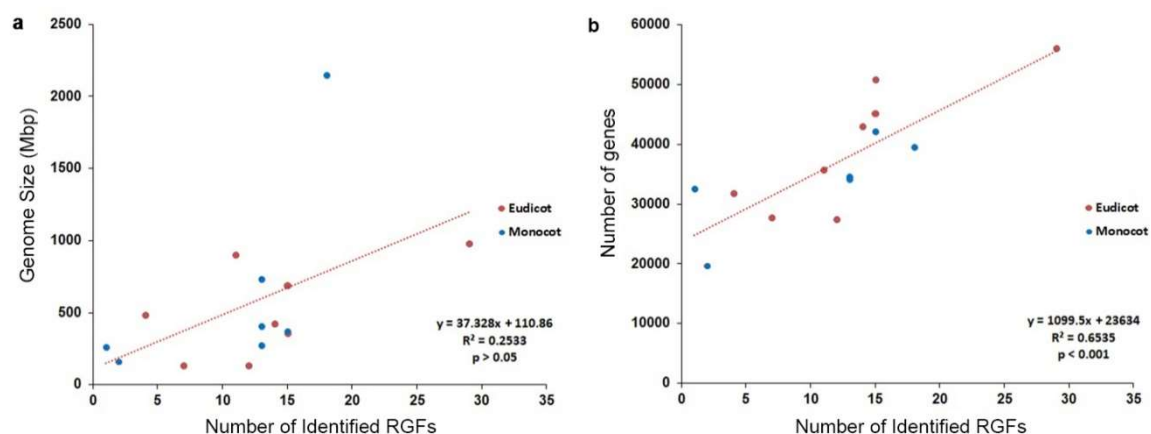

**Figure S1.** The relationship between genome size (A) or the total number of genes within the genome (B) and the number of identified RGFs from all the monocots (blue) and the eudicots (red) from the selected 24 species.

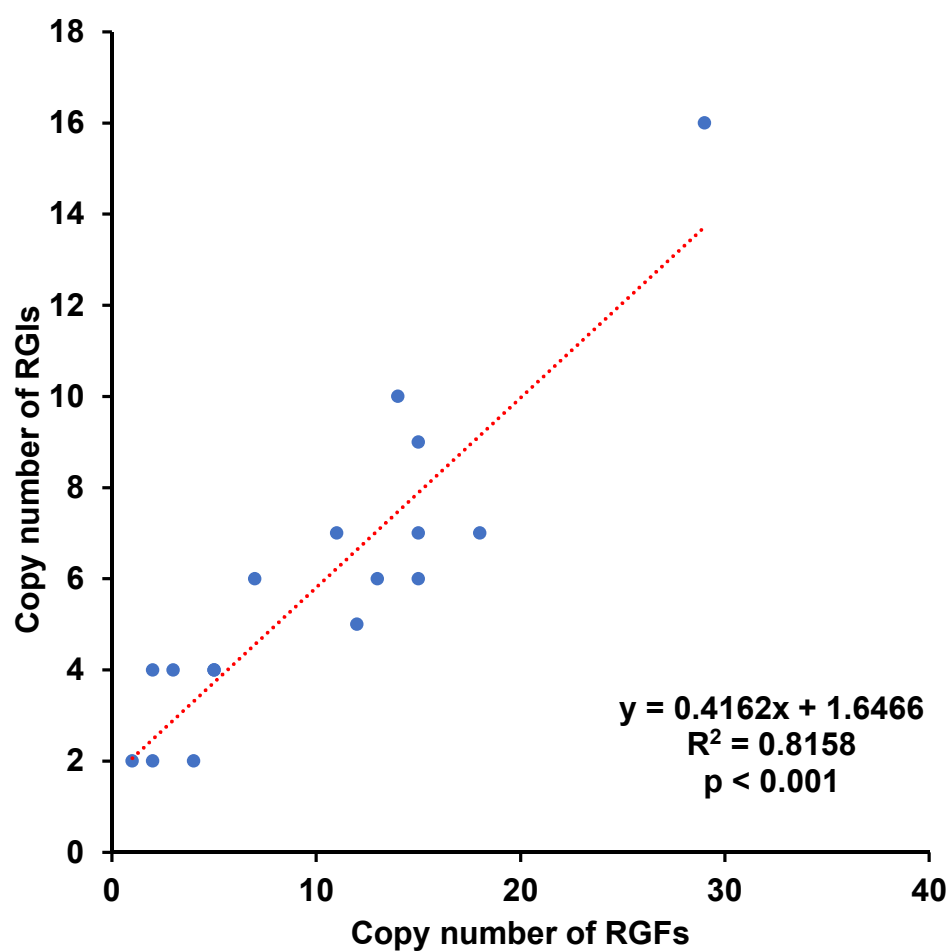

**Figure S2.** A significantly positive correlation (Pearson correlation,  $P$ -value  $< 0.001$ ) of copy numbers between RGFs and their receptors, RGLs, across plant species indicates co-expansion between RGFs and their receptors, RGLs during plant evolution.

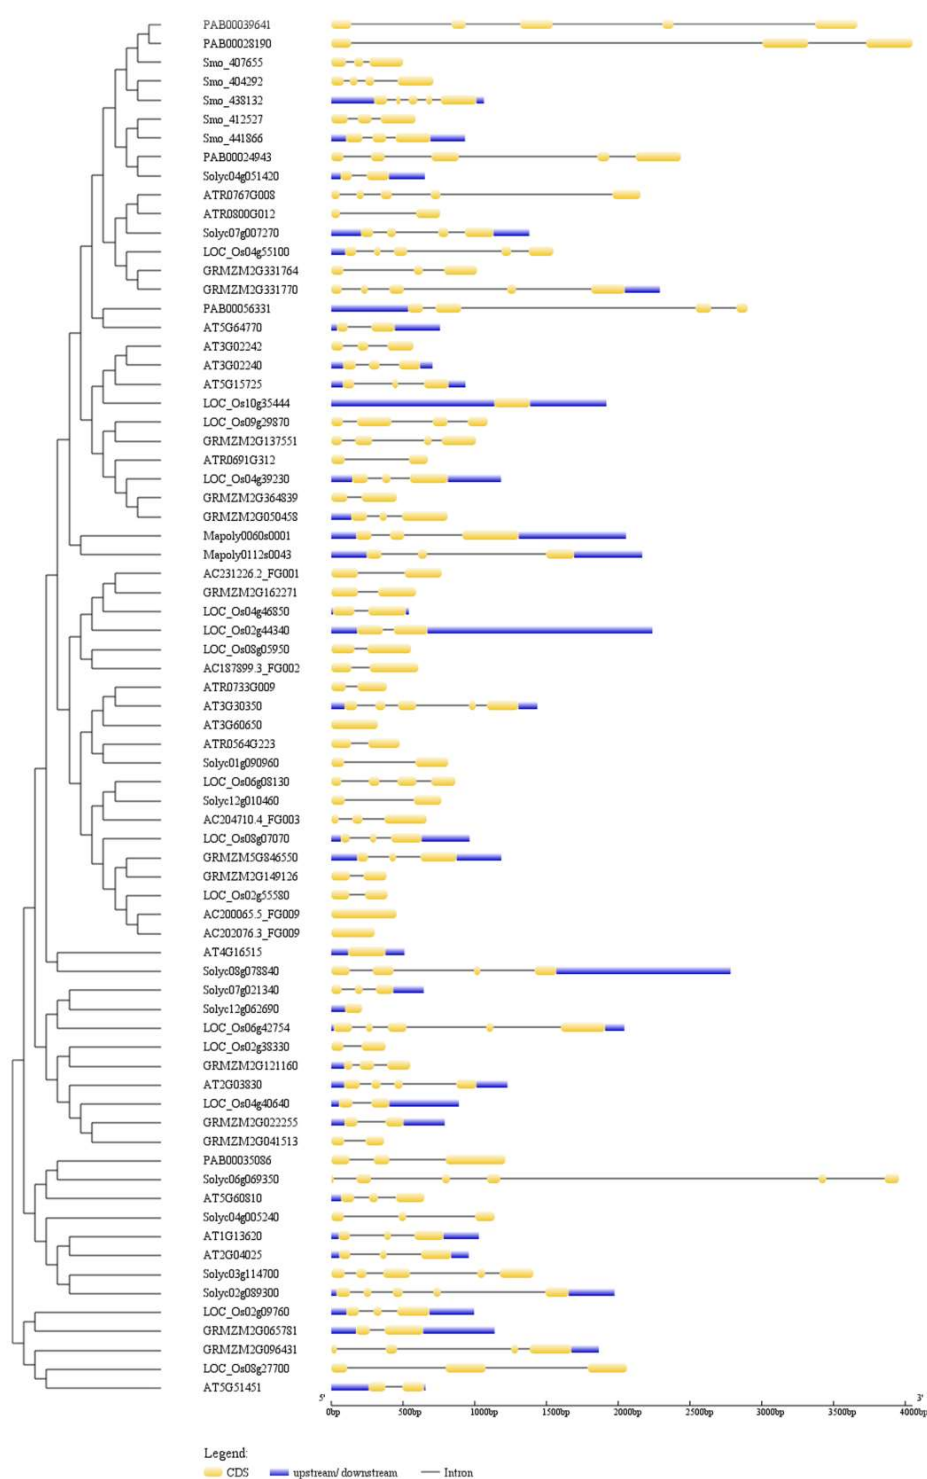

**Figure S3.** Diversified gene structures of the *RGF* family. The intron/exon structures of each gene were determined by comparison of the CDS sequences with their corresponding genomic sequences. Phylogenetic tree constructed by the neighbor-joining method with 1,000 bootstrap replicates using MEGA 6 software.

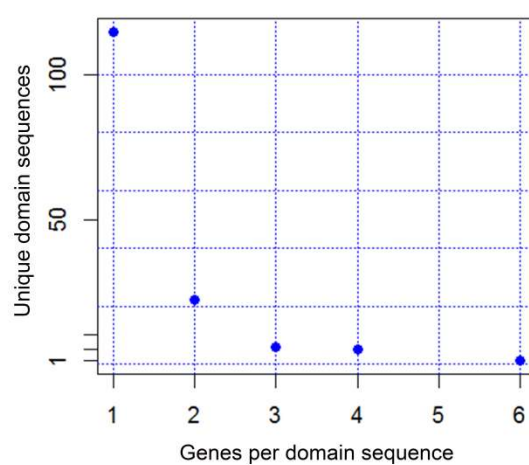

**Figure S4.** The distribution of the number of genes associated with each unique domain sequence. 115 RGF domain sequences were present in only one RGF protein while 34 were shared by multiple RGF proteins.

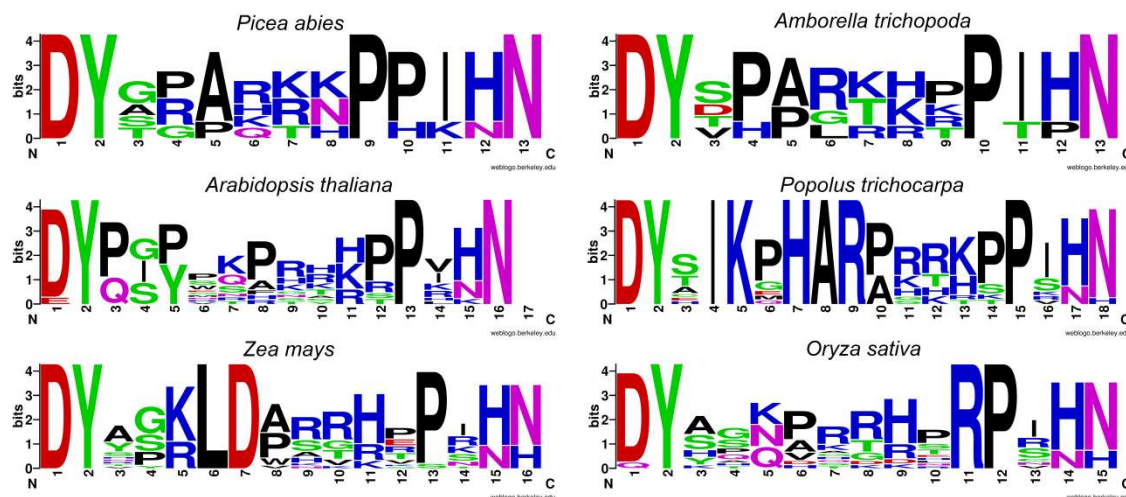

**Figure S5.** Sequence logos for the RGF domain in each species. Sequence logos are based on weighted RGF domain sequences identified in the genomes of different plant species. Except for the conserved Asp at position 1, Tyr at position 2, and Pro in the second half of the RGF domain, the other amino acid residues differ greatly. The size of the amino acid symbol represents the degree of conservation.

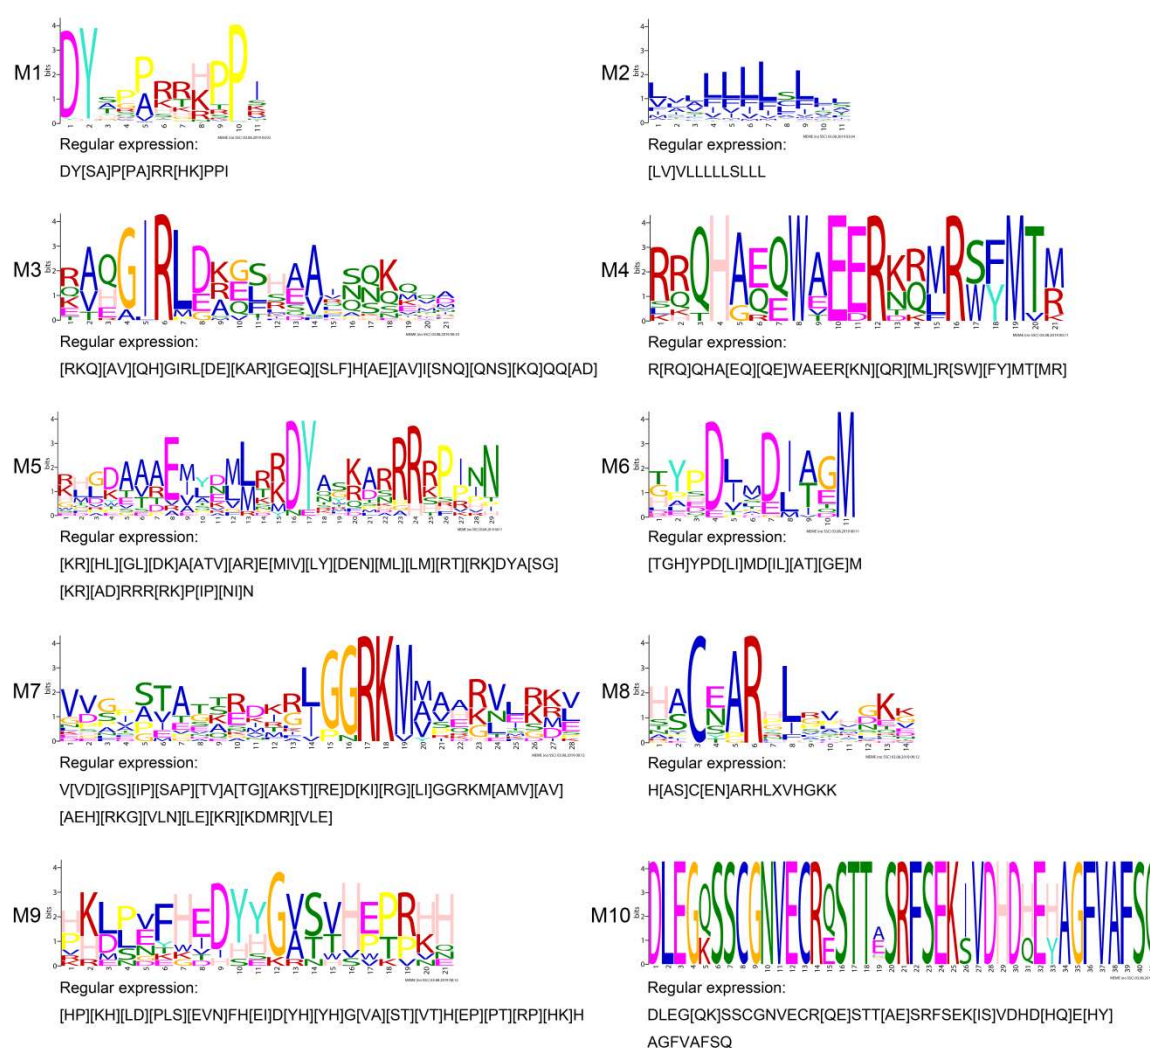

**Figure S6.** Sequence logos of different motifs identified in the RGF family. Ten distinct motifs were identified in these proteins using the MEME motif detection software. Most RGF members contain Motif 1 and Motif 2, and some motifs are unique to only some lineages. The size of the amino acid symbol represents the degree of conservation.

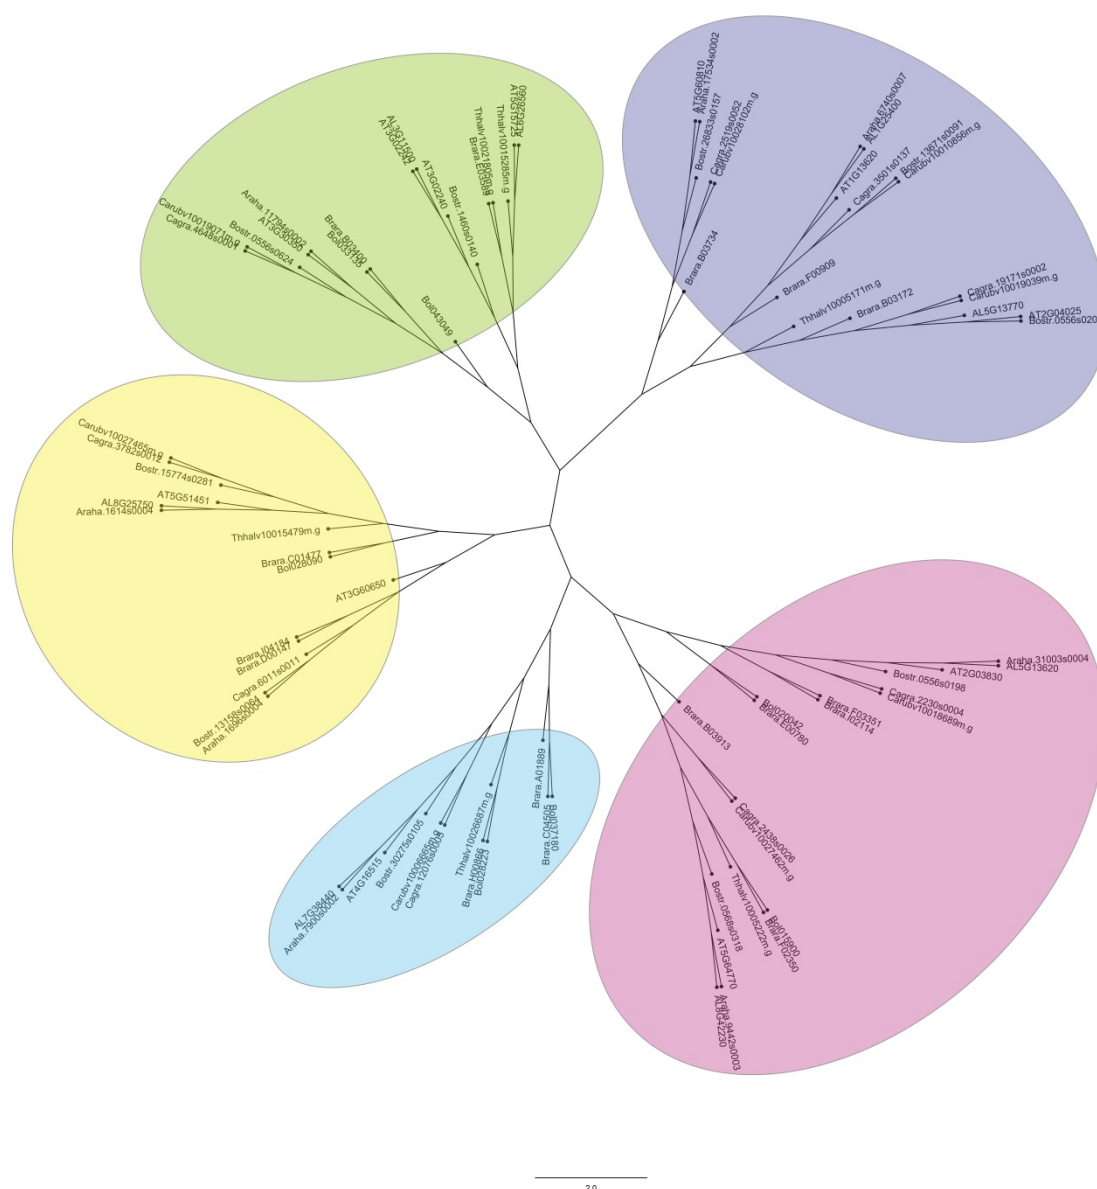

**Figure S7.** Phylogenetic tree of RGF proteins from Brassicaceae species. The phylogenetic tree was constructed using MEGA 6 by the neighbor-joining method and was based on full-length amino acid sequences with sequences from some Brassicaceae species.

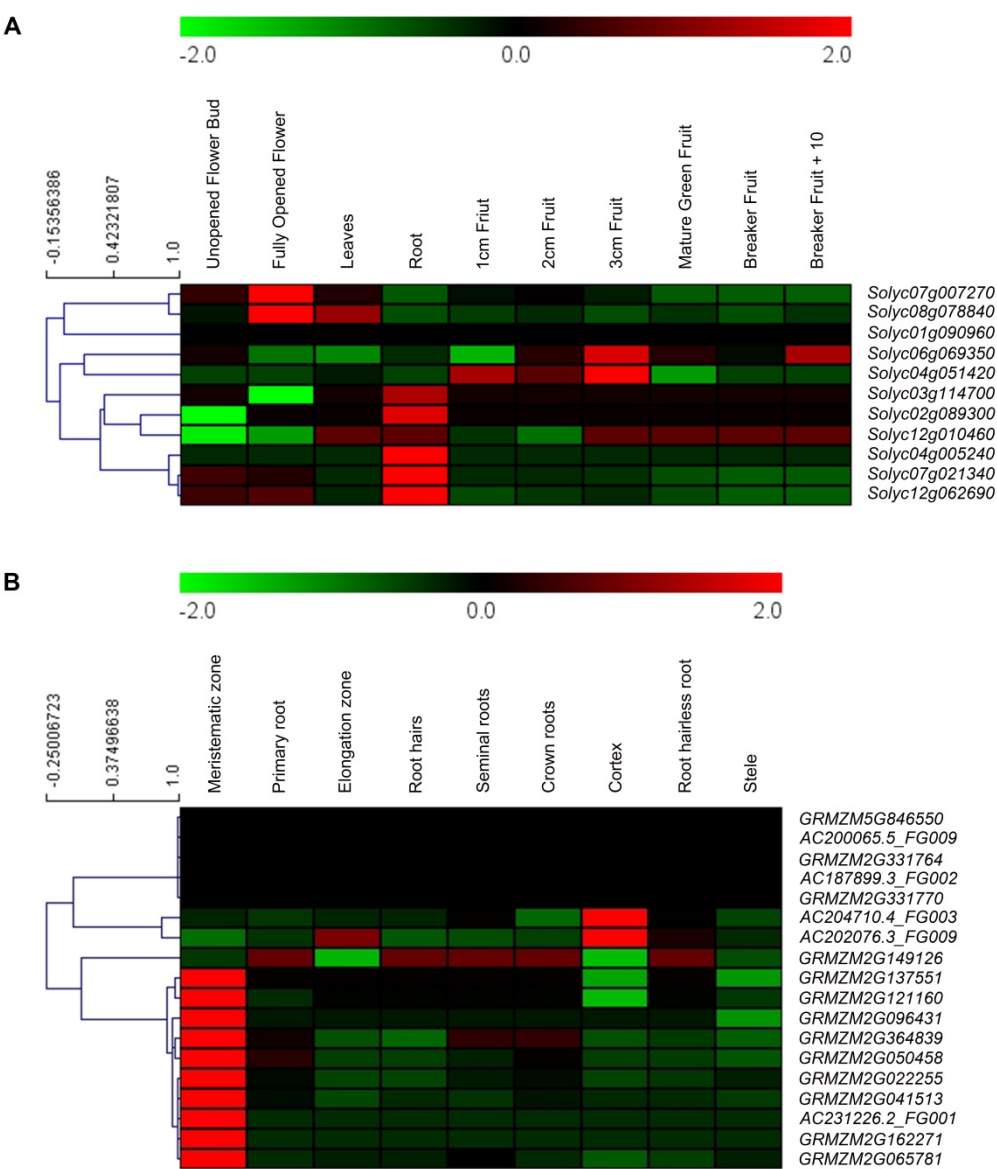

**Figure S8.** Expression analysis of tomato (**A**) and maize (**B**) *RGF* genes. Heat maps indicate the expression levels of *RGF* genes in different tissues as determined from the e-FP browser. The color scale indicates the expression levels of *RGFs*. Red marks high expression, and green marks low expression.



|           |                                                                                  |     |
|-----------|----------------------------------------------------------------------------------|-----|
| MpRGF1    | ..MFRCSRSEWARCISLALLLKLFLFMTTGSAPLRTGYHDQIVRQSSIIIEGDFRKSTAYALPDVRVNLKGSSIRKSLHA | 78  |
| ZmRGF1    | ..MRR....QLKCVGLILLLSLLLPALSPVVVVA.TARRELLPLMATGDE.....GRFQDVSSSGTWMPGAA.        | 61  |
| SIRGF2    | ..MKQV.....LLLSLMLLSTLVYEAQ....ARNIPMLKENGDFGEVNI.....ICKDNHCSSSGSRNRKLMTKT      | 58  |
| SIRGF1    | ..MLVPR.....RILSLIILILIAQIL.....PNTTSNYQG.....                                   | 30  |
| AtRGF2    | ..MTNIT.....SSFCLLILLLFCLSFQ.....YSLHGDKDE.....VLSVDVGSNAKVMKHLDG.               | 49  |
| AtGLV9    | ..MKKTS.LKLMTLVLGFCFYILL.....QGPFGGSRNG.....                                     | 32  |
| AtGLV8    | ..MKKWSYAKLMTSALLLVFSIILLAFHGG....SRGDNHLY.....                                  | 37  |
| AtRGF1    | ..LVSIR.....VICYLIVFSVLQVHA.....KVSNAFNSQAPQMKNSEGL                              | 40  |
| AtRGF8    | ..MKLIR.....VILFLCAIALLLVPTSSLQL.....KHPYSSPSQGLSKKI....                         | 42  |
| AtRGF6    | ..LSCSL...RSGLVIVFCFILLLL.....SSNVGCASAAARRLR....                                | 34  |
| AtRGF3    | ..MTLS.....KILCVIILLLCFISFR.....YSLHEDGNQ.....QSSRDFVSTAKAIKY....                | 45  |
| AtRGF7    | MEMKKWSYANLITLALLFLFILLLAFQGG....SRDDDHQH.....                                   | 39  |
| AtRGF9    | ..MAI....RVSHKSLVAILLILFISSPT.....QARSL.....                                     | 29  |
| AtRGF4    | ..LMRFT.....IIVIAFILLIQSLEEEH.....ILVYAHEGGE.....AGHKSLDYQGDQDSSTLHP             | 51  |
| AtRGF5    | ..SSSIH.....VASMILLFLFLHHSDD....SRHLDNV.....                                     | 28  |
| Consensus | m                                                                                |     |
| MpRGF1    | DSGRSLVFNFLDDIGPIQVG.PEAIISRTTEEMDSRTI.....GHKYDSRNRRLRGARSEGP.....PSPQAW.....   | 139 |
| ZmRGF1    | .....EEAVVRRDEAMKIN.....GRFRRTSSWNW.....                                         | 88  |
| SIRGF2    | TSISS...PIITTTSTKNIK.NEGNIKAHDTTILKG.....QSSSENFSSINSSPETGH.....                 | 107 |
| SIRGF1    | .....GKIATK.RSNSVSKREALANTG.....GEQILSRPPLSQSG.....                              | 65  |
| AtRGF2    | .....DDAMKK...AQVRGR....SGQFESKE...TTKMMMKTKTKET.....                            | 83  |
| AtGLV9    | .....DLIARKLISLEP.....IETKNAARSLKDSI.....                                        | 59  |
| AtGLV8    | .....DHVAIG.TKDILMGRKLKDLKP.....KTESLKMINKPKKNGF.....                            | 74  |
| AtRGF1    | GASNG.....TQIAKKHAEDVIENRKTILKHVVNVKEANEKNGLEIESKEMVKKRK.....                    | 90  |
| AtRGF8    | .....VTKMATRKLMIISSEYVMTS...TSHEGSSEQLRVTSSEGS.....                              | 80  |
| AtRGF6    | .....SHKHHHKKVASLDV.....FNGGERRRALGGE.....                                       | 62  |
| AtRGF3    | .....GDVMKK...MIRGRKLMMASGEKEEAET...KMKRGNRETERNSS.....                          | 84  |
| AtRGF7    | .....VHVAIR.TKDISMGRKLKSLKP.....INPTKKNF.....                                    | 69  |
| AtRGF9    | .....REVVRNRTILLVEK.....SQESRKIRHEGG.....                                        | 55  |
| AtRGF4    | KE.....LFDAPRKVRFG.RTTAEKEQVTAMNN...DSWSFKISGASKHLIESISRFIYWQIMTFLSSKSLYIKI      | 119 |
| AtRGF5    | .....HITAS.RFSLVKDQNVVSSST.....SKEPVKVSREFV.....                                 | 60  |
| Consensus |                                                                                  |     |
|           | <b>RGF domain</b>                                                                |     |
| MpRGF1    | FLKQDQGRVVMVGINSTTATGQQTQPFYLSFHPAGIDHNKK...QDWSQIYA...EDTHFEESN.....            | 198 |
| ZmRGF1    | .....KKMPAAASQVSFGGR...IPFTACYH...SVHRHEFTEN.....                                | 121 |
| SIRGF2    | .....RKTSSDRHPDVL...DLAGMTYS...PAKRKEFIEN.....                                   | 137 |
| SIRGF1    | .....GKDINAE...YVAFTACYK...SPRHHEFTEN.....                                       | 91  |
| AtRGF2    | .....NVEEDDL...VAYTACYW...KPRHHEFTEN.....                                        | 109 |
| AtGLV9    | .....STDLEEVD...RLMEHEYPSPVKRKRTPVANGV.RNR                                       | 94  |
| AtGLV8    | .....EYSDQVSSDLRQEV.FVDMMARCYQG...PKPRSKPLKNN.....                               | 111 |
| AtRGF1    | .....NKKRLTKT...ESLTACYG...NPGHHEFTEN.....                                       | 116 |
| AtRGF8    | .....KDEEKKLSEEEEEKKALAKYLSMTYR...TFRRRRFVENKALPLD                               | 122 |
| AtRGF6    | .....TG.....EEVVVMYYP...QPRHKEFIEN...K                                           | 85  |
| AtRGF3    | .....KSVEEDGL...VAYTACYW...RAKHHEFTEN.....                                       | 110 |
| AtRGF7    | .....EYPDQGSQHDVQEREV...YVELACYG...QRKYKEFTEN.....                               | 102 |
| AtRGF9    | .....GSEVD...GLMDMTYN...SANKKEFIENR.....                                         | 79  |
| AtRGF4    | YIQNTFCCKMMIIVNDLISL...PTLEPSTSTNDMEKL...ARLLRDEYPIYSKRRKEFTENRA.PDK             | 181 |
| AtRGF5    | .....GFLKHHHRR...PPLLFCY...KESTREFTEN.....                                       | 88  |
| Consensus | y p n                                                                            |     |

**Figure S9.** Multiple sequence alignment of some RGFs. Alignments of full-length sequences between AtRGFs, MpRGF1, SIRGF1, SIRGF2 and ZmRGF1 were generated using DNAMAN. The colored boxes indicate certain key basic amino acid residues.

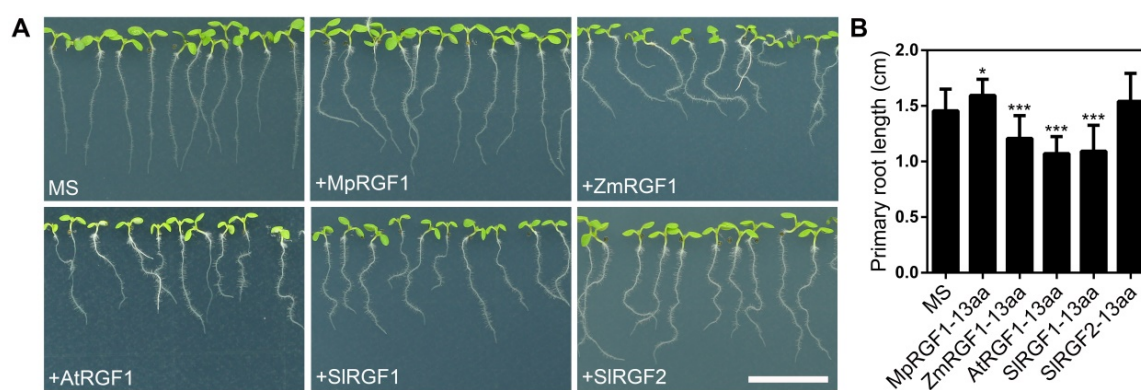

**Figure S10.** Root length of Col-0 growing on MS medium without and with the treatment of synthetic RGF peptides. **(A)** Six-day-old seedlings of wild-type plants grown on MS medium or on medium containing 1.0  $\mu$ M of synthetic peptide. **(B)** Statistical results of **(A)**. Student's *t*-tests were performed. One and three asterisks indicate the values are significantly different from the control at  $P < 0.05$  and  $P < 0.001$ , respectively.  $n > 30$ . Scale bar equals to 1 cm.

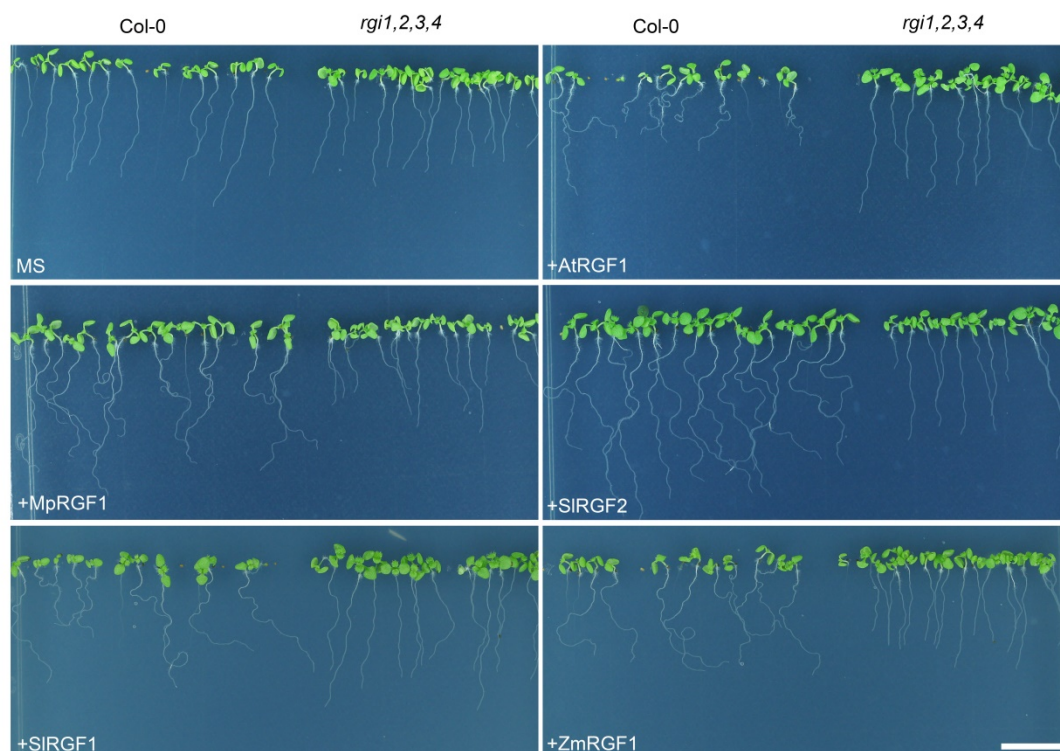

**Figure S11.** The synthetic 13-amino-acid (aa) peptides from RGF motif triggered a wavy-root phenotype when seedlings grown on slanted plates. Nine-day-old seedlings of wild-type plants and quadruple mutants grown on 1.5 % agar plates inclined at an angle of approximately 45°. Scale bar equals to 1 cm.



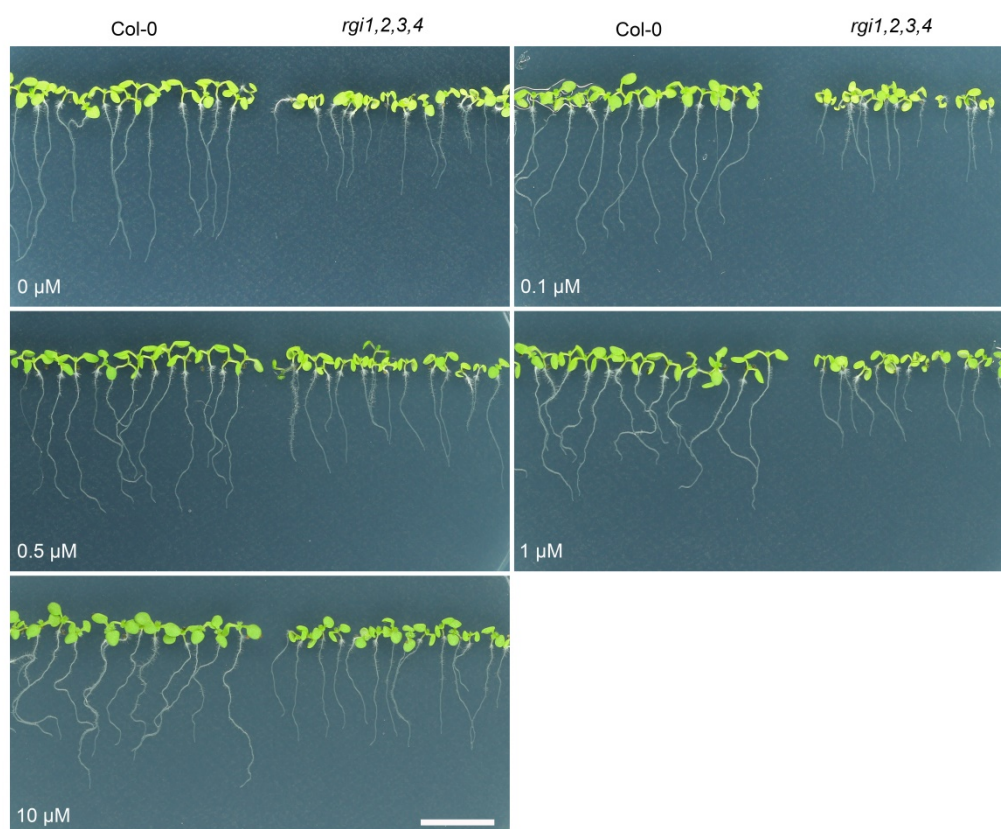

**Figure S12.** The synthetic peptide derived from MpRGF1 motif triggered a wavy-root phenotype. Six-day-old seedlings grown vertically on MS medium containing the indicated concentration (0, 0.1, 0.5, 1.0, 10.0  $\mu\text{M}$ ) of the synthetic MpRGF1 peptide. Scale bar equals to 1 cm.

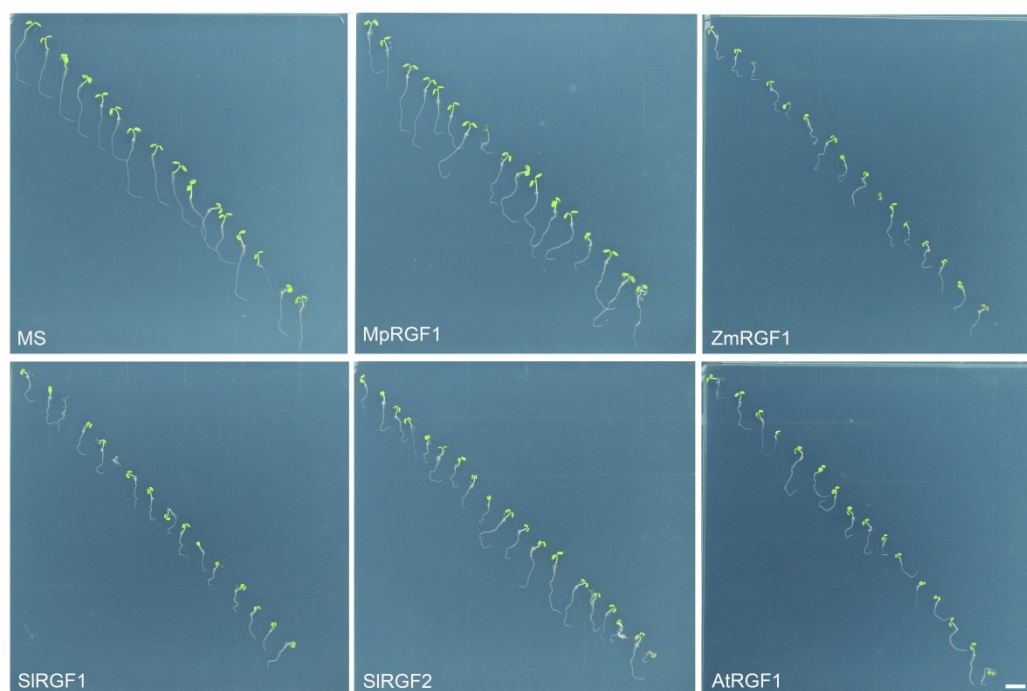

**Figure S13.** Gravitropic response of wild-type plants following gravistimulation. Three-day-old light-grown seedlings of wild-type plants were germinated on vertical plates and then placed in the dark and reoriented by a 90° angle for 24h. The pictures were taken after the plates were reoriented to its original position after the gravistimulation analysis. Scale bar equals to 5 mm.

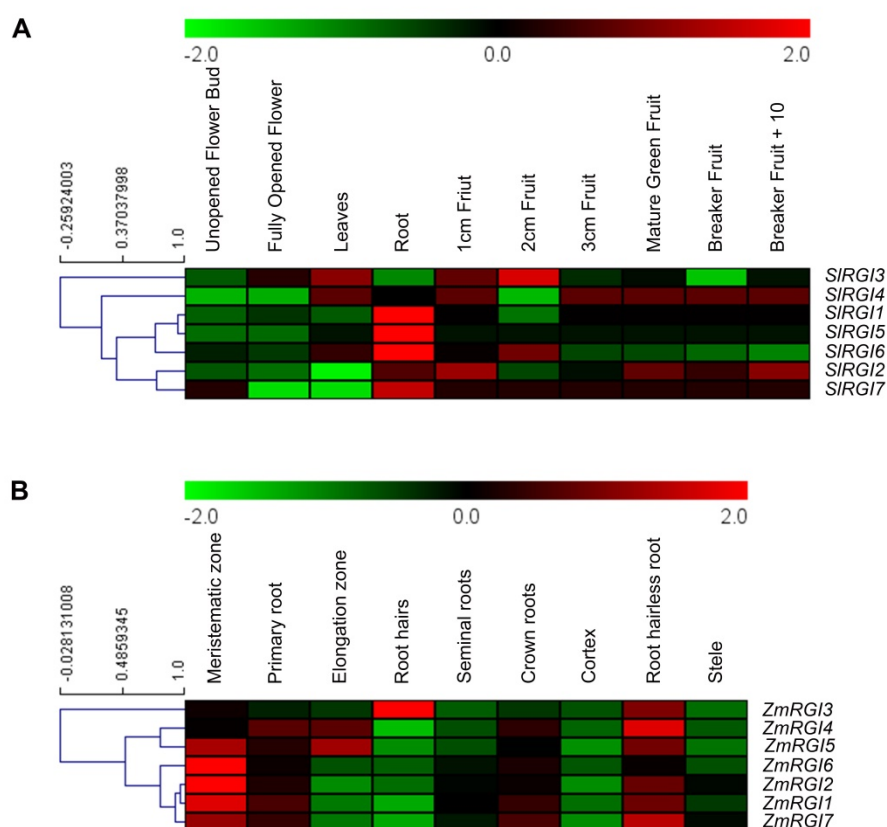

**Figure S14.** Expression analysis of tomato (**A**) and maize (**B**) *RGI* genes. Heat maps indicate the expression levels of *RGI* genes in different tissues or organs as determined from the e-FP browser. The color scale indicates the expression levels of *RGIs*. Red marks high expression, and green marks low expression.

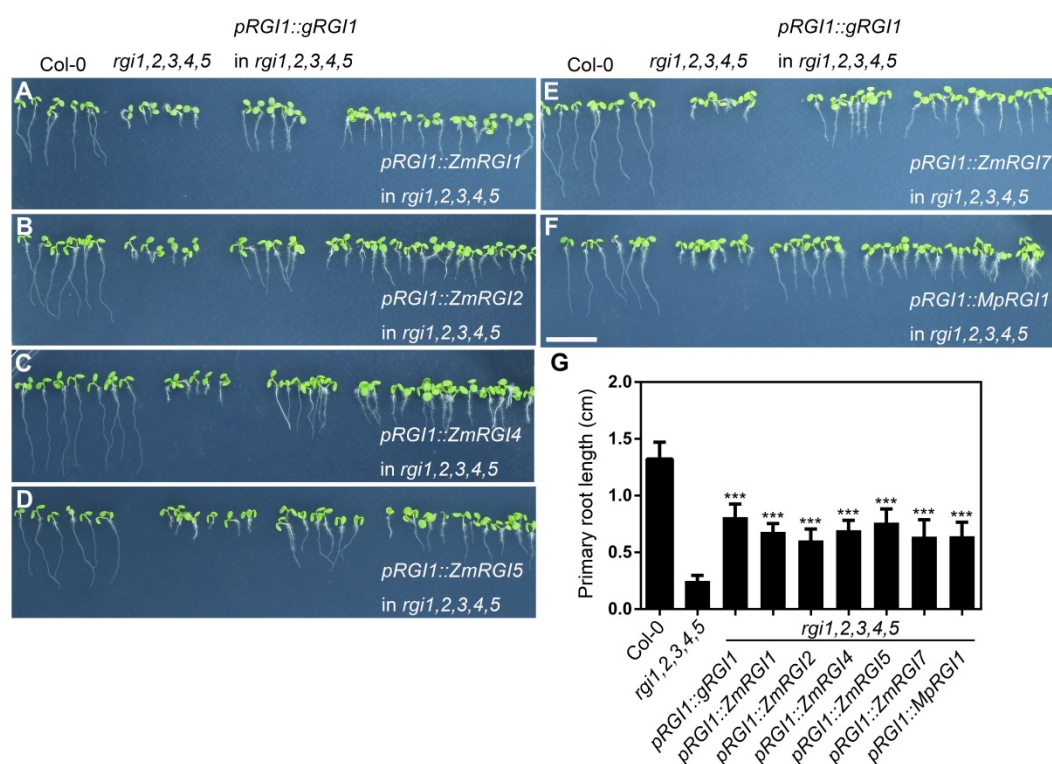

**Figure S15.** Part of *RGI*s from liverwort and maize can partially rescue the short root phenotype of the *Arabidopsis rgi1,2,3,4,5* quintuple mutant. (A-F) Seedlings cultured on MS medium for 6 days were used for photographing. (G) Statistical results of (A-F). Student's *t*-tests were performed based on the differences between different transgenic lines and the *rgi1,2,3,4,5* quintuple mutant. "\*\*\*\*" means  $P < 0.001$ .  $n > 30$ . Scale bar equals to 1 cm.

**Table S4.** Segmental duplications in *RGFs*. *Ka* and *Ks* values of each duplicated gene pairs were calculated by using PGDD database (<http://chibba.uga.edu/duplication/>).

| Block NO | Block score | E_value   | Locus_1          | Locus_2          | <i>K<sub>a</sub></i> | <i>K<sub>s</sub></i> | Omega    |
|----------|-------------|-----------|------------------|------------------|----------------------|----------------------|----------|
| 90       | 5728        | 4.00E-19  | LOC_Os02g55580   | LOC_Os06g08130   | 0.4053               | 0.8142               | 0.497789 |
| 80       | 12731       | 4.00E-13  | LOC_Os02g38330   | LOC_Os04g40640   | 0.3416               | 0.8844               | 0.386251 |
| 185      | 974         | 3.00E-06  | Bradi3g16005     | Bradi5g23716     | 0.6225               | 1.0113               | 0.615544 |
| 51       | 993         | 6.00E-13  | Bradi1g47720     | Bradi3g54310     | 0.5732               | 1.1941               | 0.480027 |
| 184      | 11501       | 1.00E-10  | Bradi3g47791     | Bradi5g13666     | 0.3558               | 0.9651               | 0.368666 |
| 96       | 1887        | 1.00E-21  | GRMZM2G050458    | GRMZM2G364839    | 0.2259               | 0.4544               | 0.497139 |
| 67       | 2325        | 6.00E-18  | GRMZM2G331770    | GRMZM5G846550    | 0.3319               | 0.6133               | 0.541171 |
| 61       | 797         | 7.00E-49  | AC231226.2_FG001 | GRMZM2G162271    | 0.1576               | 0.2008               | 0.784861 |
| 207      | 3065        | 8.00E-11  | AC200065.5_FG009 | AC202076.3_FG009 | 0.3832               | 0.961                | 0.398751 |
| 98       | 478         | 4.00E-24  | GRMZM2G022255    | GRMZM2G041513    | 0.1656               | 0.4628               | 0.357822 |
| 413      | 535         | 8.00E-14  | GRMZM2G074450    | GRMZM2G096431    | 1.2384               | 1.8081               | 0.684918 |
| 123      | 237         | 2.00E-29  | Medtr2g450420    | Medtr4g116360    | 0.3544               | 0.7251               | 0.48876  |
| 194      | 3214        | 2.00E-21  | Medtr3g095180    | Medtr8g092340    | 0.2949               | 0.8927               | 0.330346 |
| 149      | 1449        | 1.00E-17  | Solyc03g114670.2 | Solyc06g069350.1 | 0.4613               | 1.0803               | 0.427011 |
| 314      | 795         | 1.00E-22  | Solyc07g021340.2 | Solyc12g062690.1 | 0.0444               | 0.0426               | 1.042254 |
| 184      | 8078        | 4.00E-54  | Potri.002G144400 | Potri.014G060400 | 0.1857               | 0.3881               | 0.478485 |
| 394      | 317         | 4.00E-29  | Potri.006G060000 | Potri.018G119800 | 0.2485               | 0.4103               | 0.605654 |
| 386      | 3395        | 6.00E-29  | Potri.006G060000 | Potri.018G115600 | 0.2481               | 0.4123               | 0.601746 |
| 323      | 9577        | 8.00E-34  | Potri.005G087000 | Potri.007G077300 | 0.0682               | 0.3835               | 0.177836 |
| 21       | 42231       | 2.00E-34  | Potri.001G123900 | Potri.003G109500 | 0.3507               | 0.4785               | 0.732915 |
| 292      | 8042        | 3.00E-88  | Potri.004G112600 | Potri.017G102200 | 0.1643               | 0.2915               | 0.563636 |
| 31       | 2286        | 3.00E-13  | AT1G13620        | AT2G04025        | 0.3615               | 1.0547               | 0.342751 |
| 461      | 773         | 4.00E-10  | Glyma.04G217600  | Glyma.08G145000  | 0.3667               | 1.074                | 0.341434 |
| 570      | 21948       | 1.00E-22  | Glyma.05G186400  | Glyma.08G145000  | 0.0693               | 0.0352               | 1.96875  |
| 667      | 879         | 3.00E-10  | Glyma.06G148200  | Glyma.08G145000  | 0.3525               | 1.0823               | 0.325695 |
| 86       | 22032       | 1.00E-91  | Glyma.01G210300  | Glyma.11G031700  | 0.0887               | 0.1031               | 0.86033  |
| 3        | 5334        | 1.00E-67  | Glyma.01G065000  | Glyma.02G122800  | 0.0605               | 0.1504               | 0.402261 |
| 1019     | 377         | 2.00E-08  | Glyma.09G094100  | Glyma.13G165000  | 0.3539               | 0.894                | 0.395861 |
| 1347     | 2229        | 1.00E-82  | Glyma.13G165000  | Glyma.17G106100  | 0.045                | 0.0739               | 0.608931 |
| 979      | 4817        | 3.00E-118 | Glyma.08G253200  | Glyma.18G275800  | 0.0621               | 0.07                 | 0.887143 |
| 570      | 21948       | 5.00E-41  | Glyma.05G186300  | Glyma.08G144800  | 0.0173               | 0.0912               | 0.189693 |
| 630      | 2547        | 1.00E-87  | Glyma.05G017600  | Glyma.17G082400  | 0.0781               | 0.1088               | 0.717831 |
| 15       | 262         | 8.00E-21  | Glyma.01G079000  | Glyma.03G031600  | 0.3414               | 0.8195               | 0.416595 |
| 18       | 4069        | 1.00E-78  | Glyma.01G136600  | Glyma.03G031600  | 0.0365               | 0.0556               | 0.656475 |
| 266      | 10678       | 3.00E-47  | Glyma.02G079700  | Glyma.16G164100  | 0.0557               | 0.0889               | 0.626547 |
| 446      | 28247       | 4.00E-12  | Glyma.04G217600  | Glyma.06G148100  | 0.5326               | 2.0471               | 0.260173 |
| 554      | 4057        | 3.00E-16  | Glyma.05G186400  | Glyma.06G148100  | 0.4625               | 1.2358               | 0.374251 |
| 1346     | 9256        | 2.00E-43  | Glyma.13G102700  | Glyma.17G056400  | 0.0216               | 0.0944               | 0.228814 |
| 3        | 5334        | 5.00E-31  | Glyma.01G067700  | Glyma.02G124200  | 0.1563               | 0.1503               | 1.03992  |



|     |       |          |                |                  |        |        |          |
|-----|-------|----------|----------------|------------------|--------|--------|----------|
| 48  | 640   | 5.00E-65 | Smo_441866     | Smo_412527       | -1     | -1     | 1        |
| 52  | 1399  | 1.00E-38 | Smo_404292     | Smo_438132       | 0.1954 | 0.2575 | 0.758835 |
| 0   | 57645 | 2.00E-40 | 16038408       | AT1G13620        | 0.0418 | 0.1181 | 0.353937 |
| 162 | 65180 | 1.00E-55 | 16035020       | AT5G15725        | 0.068  | 0.1248 | 0.544872 |
| 93  | 3443  | 3.00E-12 | 16044694       | AT5G15725        | 0.445  | 1.1455 | 0.388477 |
| 127 | 6327  | 3.00E-54 | 16041430       | AT2G03830        | 0.052  | 0.1462 | 0.355677 |
| 193 | 64683 | 2.00E-33 | 16038383       | AT4G16515        | 0.0374 | 0.1204 | 0.310631 |
| 127 | 6327  | 2.00E-52 | 16041583       | AT2G04025        | 0.0584 | 0.1798 | 0.324805 |
| 79  | 62910 | 6.00E-23 | 16044954       | AT3G02240        | 0.1839 | 0.3527 | 0.521406 |
| 218 | 49010 | 6.00E-40 | 16037839       | AT5G64770        | 0.0398 | 0.0945 | 0.421164 |
| 133 | 60155 | 6.00E-83 | 16060007       | AT3G30350        | 0.0616 | 0.2091 | 0.294596 |
| 218 | 49010 | 7.00E-36 | 16044961       | AT5G51451        | 0.0477 | 0.0793 | 0.601513 |
| 42  | 36370 | 5.00E-25 | 16049896       | AT1G66145        | 0.2756 | 0.4408 | 0.625227 |
| 133 | 60155 | 3.00E-46 | 16055107       | AT3G60650        | 0.119  | 0.2025 | 0.587654 |
| 516 | 9547  | 1.00E-15 | Bradi5g12825   | GRMZM2G364839    | 0.5307 | 0.8513 | 0.6234   |
| 547 | 1229  | 8.00E-26 | Bradi5g23716   | GRMZM5G846550    | 0.3098 | 0.813  | 0.381058 |
| 364 | 17767 | 1.00E-32 | Bradi3g47791   | GRMZM2G121160    | 0.2348 | 0.6345 | 0.370055 |
| 542 | 6362  | 2.00E-10 | Bradi5g12825   | GRMZM2G050458    | 0.5055 | 1.0677 | 0.473448 |
| 343 | 3218  | 7.00E-08 | Bradi3g54310   | AC200065.5_FG009 | 0.4538 | 1.3581 | 0.334143 |
| 120 | 5891  | 3.00E-22 | Bradi1g47720   | GRMZM2G149126    | 0.2769 | 1.1867 | 0.233336 |
| 520 | 1983  | 2.00E-12 | Bradi5g17935   | AC231226.2_FG001 | 0.6888 | 1.0037 | 0.686261 |
| 542 | 6362  | 9.00E-22 | Bradi5g13666   | GRMZM2G022255    | 0.2517 | 0.6423 | 0.391873 |
| 517 | 6704  | 2.00E-12 | Bradi5g23716   | GRMZM2G331770    | 0.5174 | 1.1187 | 0.462501 |
| 516 | 9547  | 9.00E-17 | Bradi5g13666   | GRMZM2G041513    | 0.2388 | 0.6057 | 0.394255 |
| 541 | 7815  | 5.00E-12 | Bradi5g17935   | GRMZM2G162271    | 0.6184 | 1.0203 | 0.606096 |
| 169 | 898   | 4.00E-06 | LOC_Os02g44340 | AC231226.2_FG001 | 0.8205 | 1.3701 | 0.598861 |
| 276 | 7865  | 4.00E-17 | LOC_Os04g55100 | GRMZM2G331770    | 0.4366 | 0.8707 | 0.501436 |
| 193 | 8084  | 4.00E-09 | LOC_Os02g09760 | GRMZM2G065781    | 0.6839 | 1.6189 | 0.422447 |
| 203 | 894   | 7.00E-08 | LOC_Os02g09760 | GRMZM2G096431    | 1.0655 | 1.9751 | 0.539466 |
| 278 | 2216  | 4.00E-12 | LOC_Os04g46850 | AC231226.2_FG001 | 0.5294 | 0.6967 | 0.759868 |
| 290 | 14871 | 7.00E-12 | LOC_Os04g46850 | GRMZM2G162271    | 0.7692 | 0.9163 | 0.839463 |
| 192 | 28751 | 4.00E-15 | LOC_Os02g38330 | GRMZM2G121160    | 0.2106 | 0.5369 | 0.392252 |
| 398 | 2432  | 6.00E-36 | LOC_Os06g42754 | GRMZM2G074450    | 0.3453 | 0.6368 | 0.542242 |
| 275 | 9651  | 7.00E-18 | LOC_Os04g40640 | GRMZM2G041513    | 0.2589 | 1.0152 | 0.255024 |
| 291 | 12312 | 1.00E-21 | LOC_Os04g40640 | GRMZM2G022255    | 0.2832 | 0.9661 | 0.293137 |
| 299 | 4986  | 5.00E-15 | LOC_Os04g40640 | GRMZM2G121160    | 0.4161 | 1.0822 | 0.384495 |
| 184 | 7173  | 4.00E-13 | LOC_Os02g55580 | AC200065.5_FG009 | 0.3532 | 1.402  | 0.251926 |
| 192 | 28751 | 2.00E-14 | LOC_Os02g55580 | AC202076.3_FG009 | 0.5734 | 3.3149 | 0.172977 |
| 397 | 9356  | 1.00E-21 | LOC_Os06g08130 | GRMZM2G149126    | 0.3676 | 1.0362 | 0.354758 |
| 275 | 9651  | 3.00E-10 | LOC_Os04g39230 | GRMZM2G364839    | 0.4953 | 0.6341 | 0.781107 |
| 291 | 12312 | 3.00E-10 | LOC_Os04g39230 | GRMZM2G050458    | 0.4903 | 0.7892 | 0.621262 |
| 420 | 4050  | 3.00E-06 | Medtr5g012400  | Solyc08g078840.2 | 0.8213 | 1.9531 | 0.420511 |
| 568 | 1489  | 3.00E-08 | Medtr8g092340  | Solyc04g051420.2 | 0.6075 | 1.4562 | 0.417182 |

**Table S5.**  $K_a/K_s$  ratio in paralogous pairs of *RGF* genes.

| Paralogous pairs |                  | S     | N     | omega  | dN     | dS     |
|------------------|------------------|-------|-------|--------|--------|--------|
| AT3G02240        | AT3G02242        | 69.4  | 230.6 | 1.0198 | 0.2538 | 0.2489 |
| AT1G13620        | AT2G04025        | 70.7  | 241.3 | 0.4159 | 0.366  | 0.88   |
| AT5G51451        | AT5G60810        | 46.3  | 214.7 | 0.3074 | 0.8842 | 2.8762 |
| Solyc07g021340   | Solyc12g062690   | 26.7  | 90.3  | 1.1991 | 0.046  | 0.0384 |
| Potri.018G119800 | Potri.018G115600 | 86    | 250   | /      | 0.0203 | 0      |
| Potri.002G144400 | Potri.014G060400 | 94.3  | 310.7 | 0.4222 | 0.1725 | 0.4085 |
| Potri.004G112600 | Potri.017G102200 | 138   | 510   | 0.5173 | 0.1667 | 0.3223 |
| Potri.005G087000 | Potri.007G077300 | 70.9  | 157.1 | 0.28   | 0.0772 | 0.2758 |
| Medtr0239s0010   | Medtr0377s0010   | 78.4  | 269.6 | 2.3507 | 0.0303 | 0.0129 |
| Medtr2g450420    | Medtr4g116360    | 91.1  | 343.9 | 0.2663 | 0.3682 | 1.3823 |
| Medtr3g095180    | Medtr8g092340    | 46.5  | 184.5 | 0.1985 | 0.2716 | 1.3683 |
| Bradi1g47720     | Bradi4g16256     | 69.9  | 179.1 | 0.5632 | 0.2237 | 0.3971 |
| AC200065.5_FG009 | AC202076.3_FG009 | 82.9  | 217.1 | 0.397  | 0.4455 | 1.1223 |
| GRMZM2G022255    | GRMZM2G041513    | 48.2  | 164.8 | 0.3004 | 0.1614 | 0.5373 |
| GRMZM2G162271    | AC231226.2_FG001 | 138   | 285   | 0.981  | 0.1518 | 0.1548 |
| GRMZM2G331764    | GRMZM2G331770    | 87    | 279   | 0.8028 | 0.1561 | 0.1945 |
| LOC_Os08g27700   | LOC_Os10g35444   | 64.8  | 181.2 | 0.5452 | 0.9728 | 1.7841 |
| Smo_404292       | Smo_438132       | 111.3 | 329.7 | 0.5886 | 0.1582 | 0.2688 |
| Smo_412527       | Smo_441866       | 149.3 | 300.7 | /      | 0.0134 | 0      |
| PAB00028190      | PAB00039641      | 174.1 | 593.9 | 0.9117 | 0.6068 | 0.6655 |

**Table S6.** CODEML analysis of the selective pattern for each group.

| Group   | Model                          | Estimates of Parameters            | lnL          | Positively selected sites<br>(*: P>95%; **: P>99%) |
|---------|--------------------------------|------------------------------------|--------------|----------------------------------------------------|
| Group A | M0                             | $\omega = 0.15604$                 | -1379.201167 |                                                    |
|         | M1                             | p: 0.85098 0.14902                 | -1376.613018 |                                                    |
|         |                                | $\omega$ : 0.15573 1.00000         |              |                                                    |
|         | M2                             | p: 0.85098 0.06369 0.08534         | -1376.613018 |                                                    |
|         |                                | $\omega$ : 0.15573 1.00000 1.00000 |              |                                                    |
|         | M3                             | p: 0.06921 0.47954 0.45124         | -1360.691265 |                                                    |
|         |                                | $\omega$ : 0.00000 0.11073 0.29705 |              |                                                    |
|         |                                | p: 0.07285 0.81949 0.10766         |              |                                                    |
|         | M4                             | 0.00000 0.00000                    | -1370.928583 |                                                    |
|         |                                | $\omega$ : 0.00000 0.33333 0.66667 |              |                                                    |
|         |                                | 1.00000 3.00000                    |              |                                                    |
| Group B | M7( $\beta$ )                  | p = 1.39676                        | -1362.684933 |                                                    |
|         |                                | q = 5.90117                        |              |                                                    |
|         |                                | p0 = 0.99999                       |              |                                                    |
|         | M8<br>( $\beta$ and $\omega$ ) | p = 1.39677                        | -1362.68521  |                                                    |
|         |                                | q = 5.90115                        |              |                                                    |
|         |                                | (p1 = 0.00001)                     |              |                                                    |
|         | M0                             | $\omega = 1.00000$                 |              |                                                    |
|         |                                |                                    |              |                                                    |
|         |                                |                                    |              |                                                    |
|         | M0                             | $\omega = 0.09588$                 | -978.648429  |                                                    |
| Group C | M1                             | p: 0.59258 0.40742                 | -909.764563  |                                                    |
|         |                                | $\omega$ : 0.02810 1.00000         |              |                                                    |
|         | M2                             | p: 0.59258 0.20742 0.20000         | -909.764563  |                                                    |
|         |                                | $\omega$ : 0.02810 1.00000 1.00000 |              |                                                    |
|         | M3                             | p: 0.29455 0.30078 0.40467         | -899.658066  |                                                    |
|         |                                | $\omega$ : 0.00217 0.03732 0.34135 |              |                                                    |
|         |                                | p: 0.25704 0.38885 0.00000         |              |                                                    |
|         | M4                             | 0.14120 0.21290                    | -931.876338  |                                                    |
|         |                                | $\omega$ : 0.00000 0.33333 0.66667 |              |                                                    |
|         |                                | 1.00000 3.00000                    |              |                                                    |
| Group D | M7( $\beta$ )                  | p = 0.24698                        | -900.585808  |                                                    |
|         |                                | q = 0.86113                        |              |                                                    |
|         |                                | p0 = 0.99999                       |              |                                                    |
|         | M8<br>( $\beta$ and $\omega$ ) | p = 0.24698                        | -900.585811  |                                                    |
|         |                                | q = 0.86116                        |              |                                                    |
|         |                                | (p1 = 0.00001)                     |              |                                                    |
|         | M0                             | $\omega = 1.00000$                 |              |                                                    |
|         |                                |                                    |              |                                                    |
|         |                                |                                    |              |                                                    |
|         | M0                             | $\omega = 0.17609$                 | -1109.094047 |                                                    |
| Group E | M1                             | p: 0.46715 0.53285                 | -1085.421815 |                                                    |
|         |                                | $\omega$ : 0.09376 1.00000         |              |                                                    |
|         | M2                             | p: 0.46715 0.46957 0.06328         | -1085.421815 |                                                    |

|         |                                |                                    |              |
|---------|--------------------------------|------------------------------------|--------------|
|         | M3                             | $\omega$ : 0.09376 1.00000 1.00000 | -1068.23995  |
|         |                                | p: 0.40782 0.52188 0.07030         |              |
|         |                                | $\omega$ : 0.02622 0.22501 2.31828 |              |
|         | M4                             | p: 0.11619 0.64790 0.07120         | -1088.508937 |
|         |                                | 0.16471 0.00000                    |              |
|         |                                | $\omega$ : 0.00000 0.33333 0.66667 |              |
|         | M7( $\beta$ )                  | 1.00000 3.00000                    | -1070.159295 |
|         |                                | p = 0.70993                        |              |
|         |                                | q = 2.84125                        |              |
|         | M8<br>( $\beta$ and $\omega$ ) | p0 = 0.96455                       | -1070.104709 |
|         |                                | p = 0.74711                        |              |
|         |                                | q = 3.57733<br>(p1 = 0.03545)      |              |
|         |                                | $\omega$ = 2.00744                 |              |
| Group D | M0                             | $\omega$ = 0.06585                 | -1064.083504 |
|         | M1                             | p: 0.68425 0.31575                 | -1002.288397 |
|         |                                | $\omega$ : 0.02606 1.00000         |              |
|         | M2                             | p: 0.68425 0.25776 0.05799         | -1002.288397 |
|         |                                | $\omega$ : 0.02606 1.00000 1.00000 |              |
|         | M3                             | p: 0.52649 0.26999 0.20352         | -972.939018  |
|         |                                | $\omega$ : 0.00569 0.07459 0.47408 |              |
|         |                                | p: 0.21050 0.57275 0.00000         |              |
|         | M4                             | 0.12171 0.09504                    | -1034.959055 |
|         |                                | $\omega$ : 0.00000 0.33333 0.66667 |              |
|         |                                | 1.00000 3.00000                    |              |
|         | M7( $\beta$ )                  | p = 0.28262                        | -972.185966  |
|         |                                | q = 1.94574                        |              |
|         |                                | p0 = 0.99999                       |              |
|         | M8<br>( $\beta$ and $\omega$ ) | p = 0.28262                        | -972.186052  |
|         |                                | q = 1.94577                        |              |
|         |                                | (p1 = 0.00001)                     |              |
|         |                                | $\omega$ = 1.00000                 |              |
| Group E | M0                             | $\omega$ = 0.25965                 | -1491.032659 |
|         | M1                             | p: 0.24755 0.75245                 | -1459.89263  |
|         |                                | $\omega$ : 0.07548 1.00000         |              |
|         | M2                             | p: 0.24755 0.61920 0.13325         | -1459.89263  |
|         |                                | $\omega$ : 0.07548 1.00000 1.00000 |              |
|         | M3                             | p: 0.17884 0.39618 0.42497         | -1442.169088 |
|         |                                | $\omega$ : 0.01597 0.22809 0.59988 |              |
|         |                                | p: 0.09081 0.50680 0.05523         |              |
|         | M4                             | 0.34716 0.00000                    | -1452.676742 |
|         |                                | $\omega$ : 0.00000 0.33333 0.66667 |              |
|         |                                | 1.00000 3.00000                    |              |

|         |                                |                                                                                                 |              |                                |
|---------|--------------------------------|-------------------------------------------------------------------------------------------------|--------------|--------------------------------|
|         | M7( $\beta$ )                  | p = 0.70474<br>q = 1.19610<br>p0 = 0.99999                                                      | -1443.81166  |                                |
|         | M8<br>( $\beta$ and $\omega$ ) | p = 0.70474<br>q = 1.19612<br>(p1 = 0.00001)<br>$\omega$ = 2.78537                              | -1443.811842 |                                |
| Group F | M0                             | $\omega$ = 0.14985                                                                              | -802.69092   |                                |
|         | M1                             | p: 0.62326 0.37674<br>$\omega$ : 0.06444 1.00000                                                | -767.36782   |                                |
|         | M2                             | p: 0.62326 0.24761 0.12913<br>$\omega$ : 0.06444 1.00000 1.00000                                | -767.36782   |                                |
|         | M3                             | p: 0.22069 0.41531 0.36400<br>$\omega$ : 0.00330 0.09225 0.66676<br>p: 0.15792 0.52911 0.00000  | -756.729738  |                                |
|         | M4                             | 0.20678 0.10619<br>$\omega$ : 0.00000 0.33333 0.66667<br>1.00000 3.00000                        | -768.393313  |                                |
|         | M7( $\beta$ )                  | p = 0.36409<br>q = 0.91021<br>p0 = 0.89997                                                      | -759.044137  |                                |
|         | M8<br>( $\beta$ and $\omega$ ) | p = 0.44465<br>q = 1.75878<br>(p1 = 0.10003)<br>$\omega$ = 1.76501                              | -758.608163  | 1 S 10 G                       |
|         | M0                             | $\omega$ = 0.00224                                                                              | -720.707068  |                                |
|         | M1                             | p: 0.69156 0.30844<br>$\omega$ : 0.04934 1.00000                                                | -714.234832  |                                |
|         | M2                             | p: 0.66376 0.12221 0.21403<br>$\omega$ : 0.08010 1.00000 63.89464                               | -713.777233  | 1 M 4 A 24 I 26 G<br>48 Q 49 E |
| Group G | M3                             | p: 0.24054 0.52264 0.23682<br>$\omega$ : 0.00000 0.15078 38.31321<br>p: 0.26266 0.53303 0.00000 | -710.435893  |                                |
|         | M4                             | 0.00000 0.20431<br>$\omega$ : 0.00000 0.33333 0.66667<br>1.00000 3.00000                        | -712.51945   |                                |
|         | M7( $\beta$ )                  | p = 0.44165<br>q = 1.47164<br>p0 = 0.77716                                                      | -713.124319  |                                |
|         | M8                             | p = 0.63805<br>q = 3.81979<br>(p1 = 0.22284)<br>$\omega$ = 48.58975                             | -711.309555  | 1 M 4 A 24 I<br>26 G 48 Q 49 E |

|         |               |                                   |              |                     |
|---------|---------------|-----------------------------------|--------------|---------------------|
| Group H | M0            | $\omega = 0.07936$                | -983.364551  |                     |
|         | M1            | p: 0.75037 0.24963                | -954.449406  |                     |
|         |               | $\omega: 0.07634$ 1.00000         |              |                     |
|         | M2            | p: 0.12499 0.66360 0.21141        | -990.918416  | 2 T * 6 L * 14 W ** |
|         |               | $\omega: 0.00000$ 1.00000 4.09212 |              | 15 K ** 17 R        |
|         | M3            | p: 0.12438 0.62191 0.25371        | -938.803268  |                     |
|         |               | $\omega: 0.00000$ 0.05357 0.39521 |              |                     |
|         |               | p: 0.12493 0.64243 0.00000        |              |                     |
|         | M4            | 0.14623 0.08641                   | -957.914964  |                     |
|         |               | $\omega: 0.00000$ 0.33333 0.66667 |              |                     |
|         |               | 1.00000 3.00000                   |              |                     |
| Group I | M7( $\beta$ ) | p = 0.57801                       | -939.496468  |                     |
|         |               | q = 4.15942                       |              |                     |
|         |               | p0 = 0.99999                      |              |                     |
|         | M8            | p = 0.57801                       | -939.496569  |                     |
|         |               | q = 4.15939                       |              |                     |
|         |               | (p1 = 0.00001)                    |              |                     |
|         | M0            | $\omega = 1.00000$                |              |                     |
|         |               | $\omega = 0.26360$                | -1443.583719 |                     |
|         |               | p: 0.59699 0.40301                | -1420.199687 |                     |
|         | M1            | $\omega: 0.15978$ 1.00000         |              |                     |
|         |               | p: 0.59699 0.29115 0.11187        | -1420.199687 |                     |
| Group I | M2            | $\omega: 0.15978$ 1.00000 1.00000 |              |                     |
|         |               | p: 0.10035 0.46847 0.43117        | -1410.652294 |                     |
|         | M3            | $\omega: 0.00000$ 0.15175 0.59106 |              |                     |
|         |               | p: 0.10967 0.63778 0.00000        |              |                     |
|         |               | 0.25255 0.00000                   | -1417.469654 |                     |
|         | M4            | $\omega: 0.00000$ 0.33333 0.66667 |              |                     |
|         |               | 1.00000 3.00000                   |              |                     |
|         |               | p = 0.78763                       | -1412.066059 |                     |
|         | M7( $\beta$ ) | q = 1.59246                       |              |                     |
|         |               | p0 = 0.99999                      |              |                     |
|         | M8            | p = 0.78764                       | -1412.066078 |                     |
|         |               | q = 1.59250                       |              |                     |
|         |               | (p1 = 0.00001)                    |              |                     |
|         | M0            | $\omega = 1.00000$                |              |                     |
|         |               | $\omega = 0.26360$                | -1443.583719 |                     |

**Table S7.** Likelihood ratio test of positive selection under site models for RGFs in plants.

| Group | 2L/M3 vs. M0 | 2L/M2 vs. M1 | 2L/M8 vs. M7 |
|-------|--------------|--------------|--------------|
| A     | 37.0198 *    | 0            | 0.00056      |
| B     | 157.980726 * | 0            | 0.000006     |
| C     | 81.7082 *    | 0            | 0.10918      |
| D     | 182.288964 * | 0            | 0.000172     |
| E     | 97.72714 *   | 0            | 0.00036      |
| F     | 91.922364 *  | 0            | 0.871948     |
| G     | 20.54235 *   | 0.915198     | 3.629528     |
| H     | 89.122566 *  | 72.93802 *   | 0.000202     |
| I     | 65.86286 *   | 0            | 0.00004      |

\* indicates significant at  $p < 0.001$  level.

**Publisher's Note:** MDPI stays neutral with regard to jurisdictional claims in published maps and institutional affiliations.

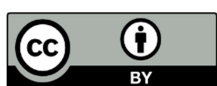

© 2020 by the authors. Submitted for possible open access publication under the terms and conditions of the Creative Commons Attribution (CC BY) license (<http://creativecommons.org/licenses/by/4.0/>).
